# Supplementary material for: Uncovering the Chemosensory System of a Subterranean Termite, Odontotermes formosanus (Shiraki) (Isoptera: Termitidae): Revealing the Chemosensory Genes and Gene Expression Patterns
Source: MDPI journal article supplement (doi:10.3390/insects14110883), 2023-11-15
Supplement: s1 [file s1]

**Table S1 The primers used in the RT-PCR and qRT-PCR for identification of putative chemosensory genes in *O. formosanus***

| Primer (For qRT-PCR) | Primer sequences (5' to 3') |
|----------------------|-----------------------------|
| <i>OforCSP1-F</i>    | TGCAGCAAATGTTCTCCTAGC       |
| <i>OforCSP1-R</i>    | GCTTTCTTCCCGTCAGGATCG       |
| <i>OforOBP1-F</i>    | AAGGCGATGATGAAAATGCTGC      |
| <i>OforOBP1-R</i>    | GCCTTTCATGGCTCCTAGAAT       |
| <i>OforOBP2-F</i>    | TTACTTCTATTGATTGTTGTGGC     |
| <i>OforOBP2-R</i>    | TTCTCCTGGCACTTTGCTTG        |
| <i>OforOR1-F</i>     | TTCAATTCAATCTTCACAGGCTACG   |
| <i>OforOR1-R</i>     | TAAATTTGCTAGGCGTTCTAAGTCAG  |
| <i>OforOR2-F</i>     | ATGCTACGTTTCGTGGTATCCC      |
| <i>OforOR2-R</i>     | AGCCAGAAATAGCCACAGGAT       |
| <i>OforGR1-F</i>     | GACAGAGTGGCACTATCAGGAATG    |
| <i>OforGR1-R</i>     | GCAGAAAGGGACACCGAAACTA      |
| <i>OforGR2-F</i>     | ACATCTTACGGTTATCCAAGGAA     |
| <i>OforGR2-R</i>     | GCCATGAGGTGTTTCGGCTGT       |
| <i>OforSNMP1-F</i>   | GGTTTCCCGTCTCTAATCCG        |
| <i>OforSNMP1-R</i>   | GTCCATTGGATTTGTTATATTGAA    |
| <i>OforSNMP2-F</i>   | GGGATGACCATCTTCGTGCTA       |
| <i>OforSNMP2-R</i>   | CCAAATTTCCCTTCTCTCAGC       |
| <b>Actin gene</b>    |                             |
| <i>β-Actin-F</i>     | GGTCTCTTATCTGCTCTATCA       |
| <i>β-Actin-R</i>     | TCTGCTATACTTCCTTCCTG        |

**Table S2.** The Blastp match of *O. formosanus* of identified chemosensory protein genes with *Drosophila* (genus) on FlyBase BLAST tool using annotated proteins (AA) database

| Gene Name        | ORF (aa) | FlyBase Blastp Match |                                       |             |         |              |                |               |
|------------------|----------|----------------------|---------------------------------------|-------------|---------|--------------|----------------|---------------|
|                  |          | Description          | Species                               | ID          | Score   | E-value      | Identities (%) | Positives (%) |
| <i>OforOBP1</i>  | 106      | Obp83a-PB            | <i>Drosophila melanogaster</i> (Dmel) | FBpp0311427 | 40.0466 | 0.000414628  | 37.5           | 54.2          |
| <i>OforOBP2</i>  | 155      | Obp56d-PB            | <i>Drosophila melanogaster</i> (Dmel) | FBpp0311727 | 44.2838 | 4.68988e-05  | 23.8           | 42.7          |
| <i>OforOBP3</i>  | 139      | Obp83a-PB            | <i>Drosophila melanogaster</i> (Dmel) | FBpp0311427 | 68.5514 | 1.99131e-12  | 28             | 54.2          |
| <i>OforOBP4</i>  | 138      | Obp28a-PA            | <i>Drosophila melanogaster</i> (Dmel) | FBpp0076996 | 47.7506 | 3.49948e-06  | 39             | 59.3          |
| <i>OforOBP5</i>  | 146      | Obp19a-PC            | <i>Drosophila melanogaster</i> (Dmel) | FBpp0297995 | 63.5438 | 5.9664e-11   | 29             | 55.9          |
| <i>OforOBP6</i>  | 72       | Obp19a-PC            | <i>Drosophila melanogaster</i> (Dmel) | FBpp0297995 | 35.8094 | 0.00851655   | 26.2           | 53.8          |
| <i>OforOBP7</i>  | 160      | Obp56g-PB            | <i>Drosophila melanogaster</i> (Dmel) | FBpp0089127 | 42.3578 | 0.000206394  | 31.7           | 52.5          |
| <i>OforOBP8</i>  | 170      | Obp56e-PB            | <i>Drosophila melanogaster</i> (Dmel) | FBpp0309474 | 40.4318 | 0.000806394  | 26.9           | 46.3          |
| <i>OforOBP9</i>  | 210      | CG17994-PA           | <i>Drosophila melanogaster</i> (Dmel) | FBpp0085345 | 31.9574 | 0.431517     | 39.6           | 54.2          |
| <i>OforOBP10</i> | 144      | Obp56c-PB            | <i>Drosophila melanogaster</i> (Dmel) | FBpp0089321 | 37.7354 | 0.00371322   | 23.5           | 40.9          |
| <i>OforOBP11</i> | 151      | lush-PB              | <i>Drosophila melanogaster</i> (Dmel) | FBpp0290704 | 55.0694 | 2.86563e-08  | 37.8           | 59.5          |
| <i>OforOBP12</i> | 146      | Obp19a-PC            | <i>Drosophila melanogaster</i> (Dmel) | FBpp0297995 | 63.5438 | 6.64997e-11  | 27.4           | 47.3          |
| <i>OforOBP13</i> | 58       | Obp99b-PB            | <i>Drosophila melanogaster</i> (Dmel) | FBpp0305400 | 26.9498 | 4.33555      | 31             | 58.6          |
| <i>OforCSP1</i>  | 52       | EbpIII-PC            | <i>Drosophila melanogaster</i> (Dmel) | FBpp0309999 | 42.743  | 6.57797e-05  | 43.2           | 64.9          |
| <i>OforOR1</i>   | 307      | Or13a-PA             | <i>Drosophila melanogaster</i> (Dmel) | FBpp0073938 | 44.669  | 0.000112595  | 23.9           | 39.7          |
| <i>OforOR2</i>   | 346      | Orco-PB              | <i>Drosophila melanogaster</i> (Dmel) | FBpp0112105 | 433.335 | 1.61449e-121 | 62             | 73.1          |
| <i>OforOR3</i>   | 417      | Or2a-PA              | <i>Drosophila melanogaster</i> (Dmel) | FBpp0070381 | 75.0998 | 1.50253e-13  | 24.5           | 45.6          |
| <i>OforOR4</i>   | 111      | Orco-PB              | <i>Drosophila melanogaster</i> (Dmel) | FBpp0112105 | 60.4622 | 3.01364e-10  | 34.1           | 60            |
| <i>OforOR5</i>   | 479      | Or85d-PA             | <i>Drosophila melanogaster</i> (Dmel) | FBpp0081361 | 80.4925 | 4.19937e-15  | 28.2           | 55            |
| <i>OforOR6</i>   | 413      | Or49b-PA             | <i>Drosophila melanogaster</i> (Dmel) | FBpp0086894 | 65.4698 | 1.13664e-10  | 22.8           | 41.1          |
| <i>OforOR7</i>   | 286      | Or49b-PA             | <i>Drosophila melanogaster</i> (Dmel) | FBpp0086894 | 73.1738 | 2.97715e-13  | 23.5           | 47.1          |
| <i>OforOR8</i>   | 110      | Or43a-PA             | <i>Drosophila melanogaster</i> (Dmel) | FBpp0088122 | 68.9366 | 8.70296e-13  | 38.7           | 69.3          |
| <i>OforOR9</i>   | 275      | Or2a-PA              | <i>Drosophila melanogaster</i> (Dmel) | FBpp0070381 | 80.4925 | 1.75329e-15  | 25.2           | 47.7          |
| <i>OforOR10</i>  | 174      | Or49b-PA             | <i>Drosophila melanogaster</i> (Dmel) | FBpp0086894 | 77.0258 | 8.98236e-15  | 24.4           | 53.6          |
| <i>OforOR11</i>  | 121      | Or92a-PA             | <i>Drosophila melanogaster</i> (Dmel) | FBpp0083295 | 60.077  | 4.48833e-10  | 25.2           | 52.3          |
| <i>OforOR12</i>  | 124      | Or85f-PA             | <i>Drosophila melanogaster</i> (Dmel) | FBpp0081506 | 57.7658 | 2.4431e-09   | 33.3           | 64.3          |

|                  |     |          |                                          |             |         |             |      |      |
|------------------|-----|----------|------------------------------------------|-------------|---------|-------------|------|------|
| <i>OforOR13</i>  | 96  | Or92a-PA | <i>Drosophila melanogaster</i><br>(Dmel) | FBpp0083295 | 43.8986 | 3.42232e-05 | 20.7 | 52.2 |
| <i>OforOR14</i>  | 80  | KCNQ-PD  | <i>Drosophila melanogaster</i><br>(Dmel) | FBpp0289111 | 29.6462 | 0.56352     | 25   | 50   |
| <i>OforOR15</i>  | 157 | Or43a-PA | <i>Drosophila melanogaster</i><br>(Dmel) | FBpp0088122 | 65.855  | 1.54244e-11 | 26.2 | 48.1 |
| <i>OforGR1</i>   | 273 | Gr64f-PA | <i>Drosophila melanogaster</i><br>(Dmel) | FBpp0073057 | 177.563 | 1.19045e-44 | 38   | 60.1 |
| <i>OforGR2</i>   | 290 | Gr64a-PA | <i>Drosophila melanogaster</i><br>(Dmel) | FBpp0073050 | 164.851 | 7.50108e-41 | 35.6 | 56.2 |
| <i>OforGR3</i>   | 308 | Gr64f-PA | <i>Drosophila melanogaster</i><br>(Dmel) | FBpp0073057 | 214.157 | 1.23227e-55 | 39.5 | 60.2 |
| <i>OforGR4</i>   | 348 | Gr28b-PE | <i>Drosophila melanogaster</i><br>(Dmel) | FBpp0089143 | 46.595  | 4.39474e-05 | 26.1 | 51.3 |
| <i>OforGR5</i>   | 248 | Gr63a-PB | <i>Drosophila melanogaster</i><br>(Dmel) | FBpp0113004 | 140.584 | 1.17536e-33 | 37.3 | 58.3 |
| <i>OforGR6</i>   | 116 | Gr28a-PA | <i>Drosophila melanogaster</i><br>(Dmel) | FBpp0079087 | 78.5666 | 1.22593e-15 | 45.6 | 65.6 |
| <i>OforGR7</i>   | 82  | Gr23a-PB | <i>Drosophila melanogaster</i><br>(Dmel) | FBpp0077386 | 41.2022 | 0.000194491 | 53.5 | 65.1 |
| <i>OforGR8</i>   | 117 | Gr5a-PA  | <i>Drosophila melanogaster</i><br>(Dmel) | FBpp0070768 | 43.5134 | 4.66392e-05 | 31.1 | 62.3 |
| <i>OforGR9</i>   | 59  | Gr63a-PB | <i>Drosophila melanogaster</i><br>(Dmel) | FBpp0113004 | 35.8094 | 0.00822236  | 42.1 | 63.2 |
| <i>OforSNMP1</i> | 496 | Snmp1-PB | <i>Drosophila melanogaster</i><br>(Dmel) | FBpp0306056 | 359.762 | 2.98055e-99 | 39.3 | 60.5 |
| <i>OforSNMP2</i> | 515 | Snmp1-PB | <i>Drosophila melanogaster</i><br>(Dmel) | FBpp0306056 | 354.369 | 1.42787e-97 | 36.6 | 60.9 |
| <i>OforSNMP3</i> | 190 | Snmp2-PB | <i>Drosophila melanogaster</i><br>(Dmel) | FBpp0110185 | 92.8189 | 1.90631e-19 | 30.6 | 52.3 |
| <i>OforSNMP4</i> | 118 | Snmp2-PD | <i>Drosophila melanogaster</i><br>(Dmel) | FBpp0306711 | 86.6557 | 4.33878e-18 | 35.6 | 56.8 |

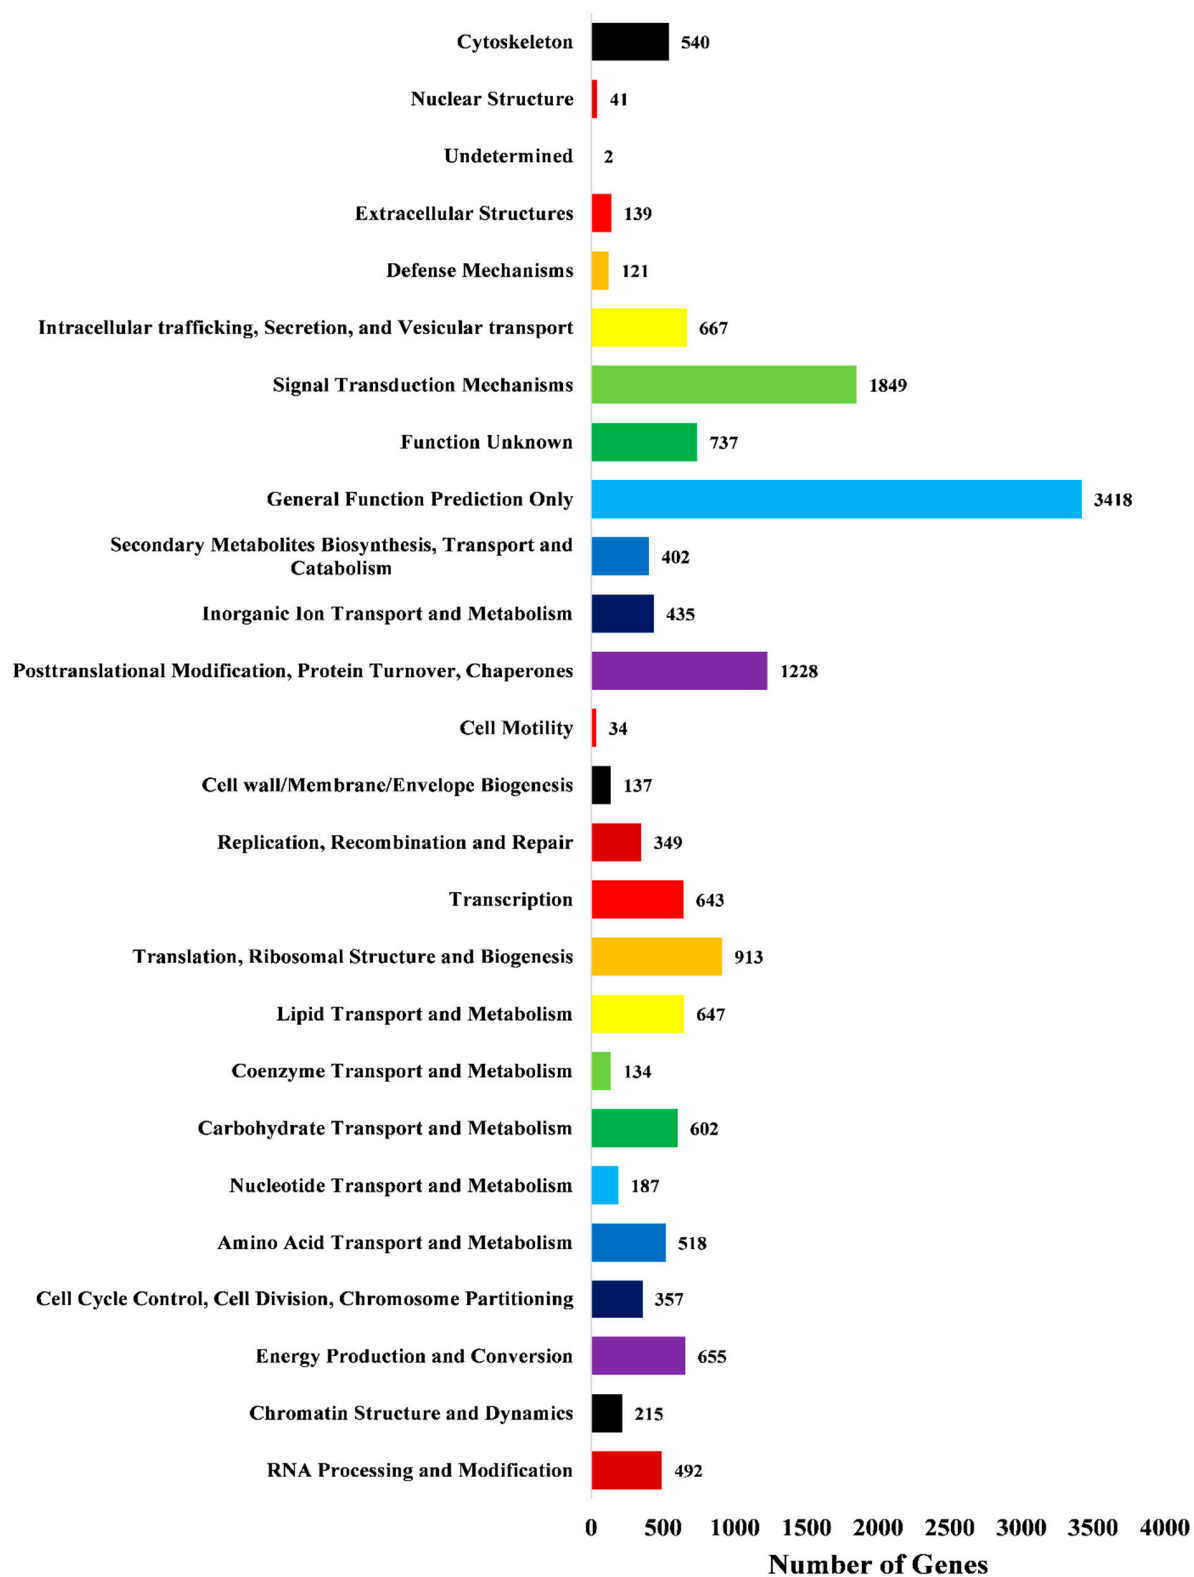

**Figure S1.** KOG annotation of unigenes in the *O. formosanus* workers.

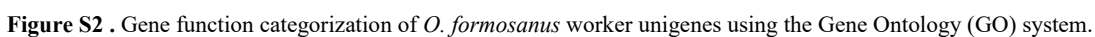

|           |                                                                                     |     |
|-----------|-------------------------------------------------------------------------------------|-----|
| OfrOBP1   | .....AFLVPTAFVI FCVASVNAADSRFDG. LDENQKAAKALRDTCLKESGS.....EEGLI LGANK              | 62  |
| OfrOBP2   | .....AKLI RHLKLLLI VVANVWCTADSACNENVGEAQKQCEHGI TDETFLENRDKEM LEDESNEESHK           | 92  |
| OfrOBP3   | .....AQLLLAATVI FFVQPAFAGSPLDK. LDDDTKAAKALHDTCTVDTGV.....QESLI ESARHGDSE           | 62  |
| OfrOBP4   | .....ARSGLSLI FLFATAHGI LGESTQS.....FKDAVSLAQECMPQVGATEDDFQTVI HNRRLATRTAK          | 84  |
| OfrOBP5   | .....NDRSAI VFVFLLLLGAFLRESFAGPSQAQLKQALKI VFNI CQPKSGATTADI DGI RKG                | 90  |
| OfrOBP6   | .....NALLRCLVI LVSSQLLVANAVPASNAKVDKEI ANKCNESNPI DQAYLDELNATG. SFPDENVRPAK         | 15  |
| OfrOBP7   | .....MAFAKI LFI SLGVSCYLSTAVPTSCHSAVEVVKFCQCLTGI SDAEVEVLQKTDI AN. NESI             | 89  |
| OfrOBP8   | .....MINLQLLVI FI FSAAAVTGFQLRSSLDGSRSEDLLNSGSRTI LSFNRRDTHDELAHSAENCCNAKHQKTI      | 85  |
| OfrOBP9   | .....M RI LFI LGAALCLTGVSF. SDEPPAAFQKQCTEHGI PDLQS. I ANPRSMTLNDVNEAGRCFVECLAREFQI | 100 |
| OfrOBP10  | .....AKTVKPAVAI LLLLGADLAVGLTGRAFERAKEVDEKCFNENQVERAYFEKFI KARI BEI DPPNN. YKCFI    | 84  |
| OfrOBP11  | .....NAGSAI NYVMTI LATVLLGTSDAL. TNDQVRQAAMAFNTCLTKI GVSAENVDAALNGQYDPGDRKAKCYTKC.  | 91  |
| OfrOBP12  | .....ANSVLNRQLTVVENA                                                                | 89  |
| OfrOBP13  | .....                                                                               | 16  |
| Consensus | .....c.....g.....d                                                                  |     |
| OfrOBP1   | DKLKAYNACTFQQVGAVST.....KI LPI CRYVVQ...I.....PAKMSI LKLWYSI                        | 106 |
| OfrOBP2   | NI AKPLLESABERGREVNEEG.....LKTDI ETCTVQSPQ.....GE                                   | 155 |
| OfrOBP3   | ENFKAYLGCYVLQTGALNENGEADYDTI I GMLPEVLEDRGGKMLNKRHI KE...N.....SAPATAFELN           | 139 |
| OfrOBP4   | DHI NPI NDRLYGFRFETVNR.....AQVVENCNEVNGRD.....TDT                                   | 138 |
| OfrOBP5   | AGLENLKKLPEELREPLKKG.....VTECRKADEGSK.....SGREAAVKV                                 | 146 |
| OfrOBP6   | AAI KQAKNLLSGETRDSVI N.....SNEKCFNAGDGI E.....DT                                    | 72  |
| OfrOBP7   | KLKDVFKHHQESVNVKADLEN.....FVDACI TKNADV.....CQ                                      | 158 |
| OfrOBP8   | VAVEFSKRAFADGLKFDEANFR.....KGVTDKNTTGD.....GK                                       | 154 |
| OfrOBP9   | NETACFLDCI LRKSNALDGGGQI I AGAATEALAQYPPFKDQSLLDKVTTCANLPVNGGGLGETVVCNQAAMQFV       | 200 |
| OfrOBP10  | EEVNNVQFARSQGKEFDVN.....KLKSSLTACNQGGG.....CK                                       | 144 |
| OfrOBP11  | EELQNVPEI VEEGHRI VK.....ACQDTPG...K.....DL                                         | 151 |
| OfrOBP12  | GSI SNAKANLPSGI AERNVA.....SI EKCRGEVDKYE.....DD                                    | 146 |
| OfrOBP13  | GGFKCFLHCLYYRYNVNDE.....EGGFLFNNAKALATTRLDDLT.                                      | 58  |
| Consensus | .....c.....c.....kc                                                                 |     |
| OfrOBP1   | .....                                                                               | 106 |
| OfrOBP2   | .....                                                                               | 155 |
| OfrOBP3   | .....                                                                               | 139 |
| OfrOBP4   | .....                                                                               | 138 |
| OfrOBP5   | .....                                                                               | 146 |
| OfrOBP6   | .....                                                                               | 72  |
| OfrOBP7   | GY.....                                                                             | 160 |
| OfrOBP8   | GTKVTLVQSSISADA                                                                     | 169 |
| OfrOBP9   | FVEEVKAQKQ.....                                                                     | 210 |
| OfrOBP10  | .....                                                                               | 144 |
| OfrOBP11  | .....                                                                               | 151 |
| OfrOBP12  | .....                                                                               | 146 |
| OfrOBP13  | .....                                                                               | 58  |
| Consensus | .....                                                                               |     |

**Figure S3.** The multiple sequence alignment of *O. formosanus* putative OBPs. There is a 20.01% amino acid similarity between all the putative OBPs. Sea green and pink, highlights are applied to the same residues, signifying 80% and 90%, similarity, respectively.

[illegible]

**Figure S4.** The multiple sequence alignment of *O. formosanus* putative ORs. There is a 18.65% amino acid similarity between all the putative ORs. Sea green and pink, highlights are applied to the same residues, signifying 80% and 90%, similarity, respectively.

|           |                                                                                                                   |     |
|-----------|-------------------------------------------------------------------------------------------------------------------|-----|
| OforGR1   | .....NTVI VLTGALVEHALSKASGI NTA VACTINI I NAFRIYYFTKTGT YDQNF A                                                   | 50  |
| OforGR2   | .....ALTSYGYPPNFGRCKLCAAALLTASTAEHLMA NYSRLLSALPDSAGGLDI I RVFFVTV. FEQVFK                                        | 65  |
| OforGR3   | NTFYGI AAATLVLF LKLARGVPQLLVQVSTLEQAQRRIYGTPTRI LRFKI RCVTAAALLGATVEHVLSDYITVSSI AQDNSTSSVLRRIYALKT. HHHLEFQ      | 98  |
| OforGR4   | .....AFVWAPHCVTGETGCRLLQTSGFDI LYSI VFI AVSTFLVNYYSNI VNI TNVFSI CNVSEKVI AFSVI LQFVLS                            | 73  |
| OforGR5   | .....NRLI VVLI NVTCVREI LYQALESN. LSNYL V                                                                         | 30  |
| OforGR6   | .....                                                                                                             | 0   |
| OforGR7   | .....                                                                                                             | 0   |
| OforGR8   | .....                                                                                                             | 0   |
| OforGR9   | .....                                                                                                             | 0   |
| Consensus | .....                                                                                                             | 0   |
| OforGR1   | VMDYSLTTAI LTLI TNFI ATFTVNFADLFI I LVSLALSERFR LFNEYI DSVRRKLAPES FVSQAREEYNSLSHLTRIL. DSCI SKI VLVSFASNI YFI CR | 149 |
| OforGR2   | VINYALVKAVLLQLSNFVATFTVSYNDFVTLVSNAL TQKYLQ LHERITTVSGKTVSLKFVREARQLYVDLCCLTRMV. DHHI SHI VLLCLI SDLYFI CL        | 164 |
| OforGR3   | YLGYSHACAF LATI AHIVATFTVT FNDLFI AI TSI ALTERFRLLNRHLQAVRGKTLSECFVKQIRENYTSLTHLTETL. NL CI SHI VLMSFASNI YFI CL  | 197 |
| OforGR4   | AFVCLLKRHTI ANI ANQLAGLNASLKRS CACVKKVCI I LASHLSI SLSVASCFSLDLFSRMGPNNRVSI TFNAMTSACFLTEFQI VCFNLMLKQLI S        | 173 |
| OforGR5   | LMTYVYQTLVRDITLGLAVYLLCYLLRSTAQH LATS FQKDVDTAARPSI VI ARYNALVLCFSRVVRQTGVAACTYTG. . . YVVLVLF LMASTVS L YGLLS    | 125 |
| OforGR6   | .....                                                                                                             | 0   |
| OforGR7   | .....                                                                                                             | 0   |
| OforGR8   | .....NAKQTHVEVRRVLR. ....                                                                                         | 14  |
| OforGR9   | .....                                                                                                             | 0   |
| Consensus | .....1 f 1                                                                                                        | 0   |
| OforGR1   | QLLSSLSPL. ....DGLVDTVVFCVSFGFLFRITVTL SLYASRI YDESLLPRVLYDVPPESYKI EVSRFLDQI VTRDVALSGMNFYI TRILLT               | 240 |
| OforGR2   | QLFNSLKKV. ....KTL YGVVFFYFSGYLLFRACLACFCAAF LNEASKKPAVL YTVPSVSINTEVERFI DQVTINEVALTGLRFVT LNRRLVLT              | 255 |
| OforGR3   | QLLYSLRGL. ....ADVYSRVVFFYFSGFLLVRTVTVSLAI ASI NDESRLPKSVLFAVPSDGYNAEVSRLQLVTTSQVALTGLNFFSVTRPALLT                | 288 |
| OforGR4   | DINDSI RDLGRI KCKNCNPCSCSQMLP LNSTTPAFVSSAYEKLQCNNTINSDSHRTKVI FVRDI QDSLCAASETLNSAYSFLLLYTSAKNI CLTHSI YFI       | 273 |
| OforGR5   | TLTKGFHLR. ....LVVLVGDSI I TGTETLVI I CDGANSVTREVG LRFQGRLLDI RQTPLCNKTEKVDALRTI ELRPPEI SFGDVI VNRGALLS          | 216 |
| OforGR6   | .....MAVSI HVHS. . NVVSYLCKMSRR LAKRTAVLVHRLISKARDPETKVELELPSLQLLHRKVRFTACGFPLDFTLLYS                             | 76  |
| OforGR7   | .....MGHI STVLRKLLAFHTDPATLSELEHFLQHVALRKFKFTVFGELTLDLSLLVS                                                       | 54  |
| OforGR8   | PRDAVHQT. ....PGRVGHKDAPVNTETDEV RVQTADVTINLPDVRDAEDKSI RDTAVAYPDAQSFHRAI SAI VVLGQCGLLPVHGVTASSAQG               | 104 |
| OforGR9   | .....NSNNRPVI SVLGVVTI NKGTVKS                                                                                    | 23  |
| Consensus | 1 k l e f f 11                                                                                                    |     |
| OforGR1   | FTTDCST. ....DGVL L L V FVI. ....CTSTHSFGVPFC SKYQ. ....                                                          | 273 |
| OforGR2   | VI GSI MT. ....YELL L VQ CED. ....VQDFGSEEP LNASTVING. ....                                                       | 290 |
| OforGR3   | MAGTI AT. ....TEV L VQ FSH. ....MEN. ....                                                                         | 308 |
| OforGR4   | LLRLFI TGSNTCDVGSPSYSHYVFLHYSI KLVVLV FYSSSAI QQCNRITAVLVHKLI TKTQDPGLREELRFLSLQ                                  | 347 |
| OforGR5   | LGSMAVT. ....ILAVELQLGI AG. ....TSDCNDAA NATTS. ....                                                              | 248 |
| OforGR6   | I VGAVTI. ....ILN L I QFQLTFATGSRFATNTSLSPNTTMI S. ....                                                           | 116 |
| OforGR7   | TGAVVT. ....ILN L I QFQL. ....ASNS. STACTKM. ....                                                                 | 82  |
| OforGR8   | LSTAANE. ....VYCTLT. ....                                                                                         | 117 |
| OforGR9   | YASTLV. ....IM V L L Q F SAG. ....QHKPENNCNVLCNTTEIN. ....                                                        | 59  |
| Consensus | t y v l qf                                                                                                        |     |

**Figure S5.** The multiple sequence alignment of *O. formosanus* putative GRs. There is a 21.36% amino acid similarity between all the putative GRs. Sea green and pink, highlights are applied to the same residues, signifying 80% and 90%, similarity, respectively.



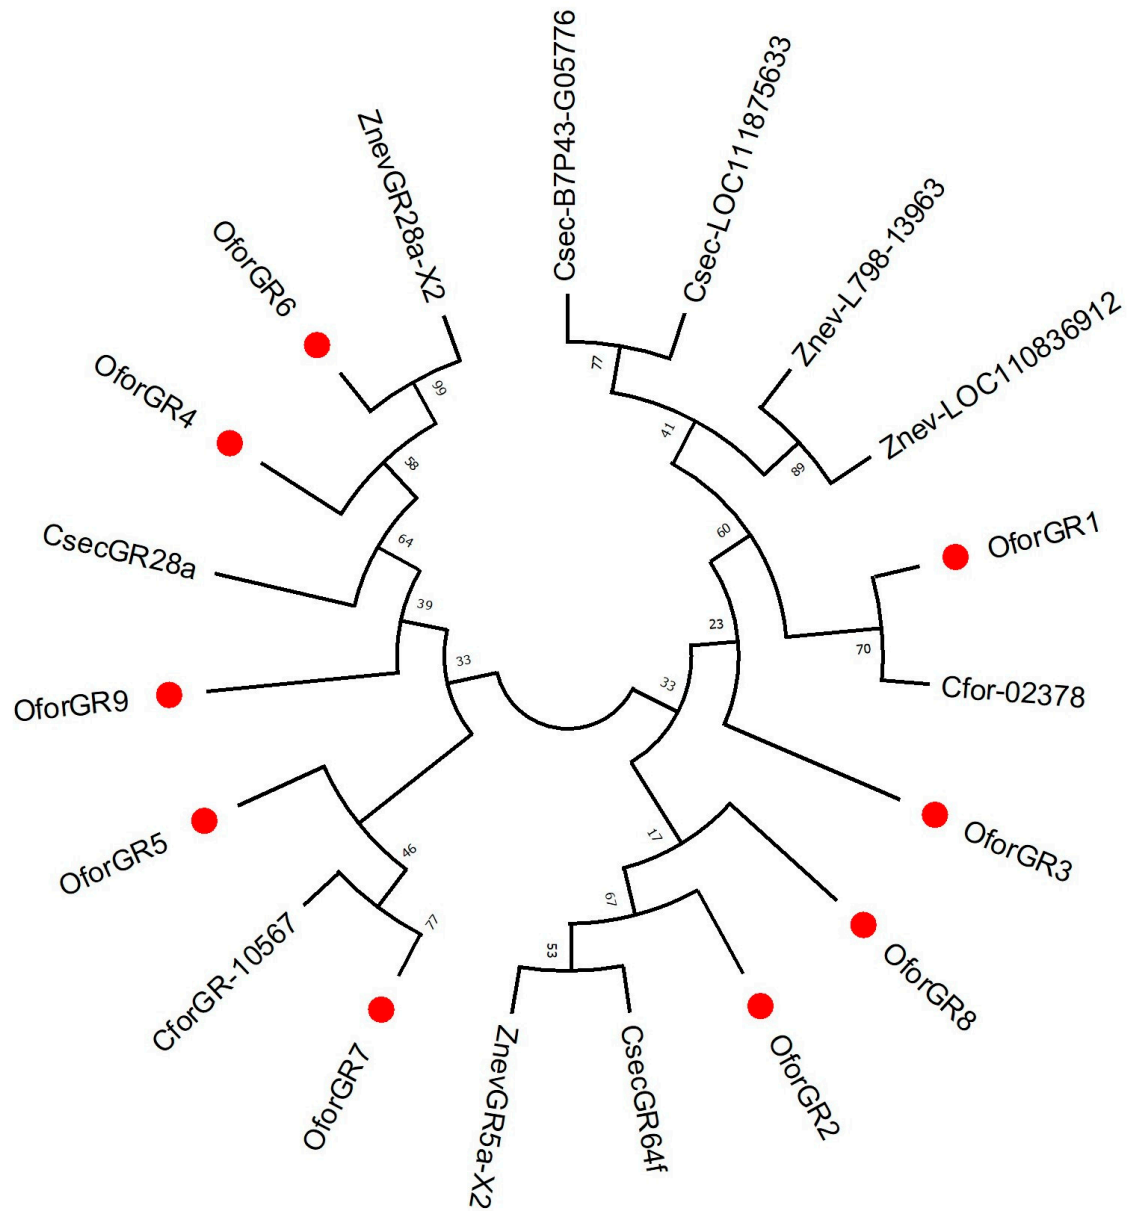

**Figure S6.** Phylogenetic tree of identified GRs with the GRs from different insect species. The identified GRs are marked red.

The percentages of bootstrap is shown in black color. The phylogenetic tree of 9 putative *OforGRs* was constructed by using the sequences from the insect species are; *Cryptotermes secundus*, *Zootermopsis nevadensis* and *Coptotermes formosanus*. GenBank accession number for all GRs genes are; Csec-B7P43-G05776; PN40292.1, Znev-L798-13963; KDR11637.1, Cfor-02378; GFG38492.1, Csec-LOC111875633; XP\_033606047.1, Znev-LOC110836912; XP\_021934317.1, CsecGR64f; XP\_023711366.1, ZnevGR5a-X2; XP\_021936907.1, CsecGR28a; XP\_023704213.2, ZnevGR28a-X2; XP\_021920101.1, CforGR-10567; GFG40019.1.

|           |                                                                                                                                       |     |
|-----------|---------------------------------------------------------------------------------------------------------------------------------------|-----|
| OforSNMP1 | .....MFLGSGVGFYGFPSLI RSQI ASNLALKKGSDLKLSKI PDGI DFKI YAFNI INPADVQAGKKPI VTEI GPYFVEEYKE                                            | 80  |
| OforSNMP2 | AKKVSLEFQSSVVLVLSGMTI FVLGAVLGVIQFPA LI RSQI TANLELKEGAEFEI NERVPIPADFAI ELFNVINPADVQAGATPVVQEWGPICNKKEDAE                            | 100 |
| OforSNMP3 | .....NPAVAFENVLEFNINPDEYQAGANPWNKEI GPYVYDEYRE                                                                                        | 41  |
| OforSNMP4 | .....                                                                                                                                 | 0   |
| Consensus | .....f l g g y g f p l i r s q i n l l k g r w p d f k i y l f n v t n p n d v q k g a p v v e i g p y y e y k e                      |     |
| OforSNMP1 | KLDELKDHNEDDTVSFNPPDYFI FKREKSGGLTGDEI TI PHMPI LANALAVEREKPAALKLI NKAI PHI FGHPTISVFLTAPVNNI LFDGI PLYGNVVDFS                        | 180 |
| OforSNMP2 | KVNI VDHEDDDTVSFNLDIVVFNKDESGTLIGEEI TI FNVLLLCVLTAAEQEI ALKLI NTAI PHI FENFNNSVFTIARAANLLFEGVAFNCTSSDFS                              | 200 |
| OforSNMP3 | KFDI EDKG DGTLSVLCNSTFNFNKRSCNLSSE                                                                                                    | 74  |
| OforSNMP4 | .....                                                                                                                                 | 0   |
| Consensus | k d i d h d d t v s f n d f y f n k e k s g l t g d e i t i p l m l r e p a l k l i n a i p h i f p s v f t a p k n l f g c d f s     |     |
| OforSNMP1 | AKAI CSEI RENDNLFKLGEDF FGFSFFGTNSAGGRFRNKRGI CDI KEVGRVVEYEGHKLSVYDGEENKFRGTDSI FAPFLTPSDKI EAFAPDLG                                 | 280 |
| OforSNMP2 | TKAVCSELKKRAFNHRI SEDF YFSF FGFKNGTIVREFEENKRGMEI KDLGKMEFKDCVLTIVVDGEECNALRGTDSTI FPFELTKKDKI EGEI PDNC                              | 300 |
| OforSNMP3 | .....                                                                                                                                 | 74  |
| OforSNMP4 | .....                                                                                                                                 | 0   |
| Consensus | ka c s e k n f e d i f s f g k n r f v k r g d i k g v e k l v d g e e c n r g t d s t i f p f l t d k i e f p d c                    |     |
| OforSNMP1 | RSI GAVVKESI VVKGI HSYSGADFQDNSTDPELKCFCTIPTTCNKKGI HDI TRCTGAPLNASLPHFYDAANEYQTQVI GLNPSKEKEBI LNVFEPLTST                            | 380 |
| OforSNMP2 | RALVAEYQATTNRGI RSYKYADLGDSTDPELGCYCTPTTCLKKGVDVSRGAGYPVVSLPHEYLADDEYLDGVVGLNPTQEKHEVTLLEPLTAT                                        | 400 |
| OforSNMP3 | .....DVVTINFAVGTVLKAQRYLPSSMILDGVEKEI FHGSENVFHTATVGD                                                                                 | 124 |
| OforSNMP4 | .....MCLGVSAI YSLPHFYNASPDYQYI QGLNFRKKEHETFLYI EPEGTGT                                                                               | 47  |
| Consensus | r a y y g i s y y a d g d s t d p e l c c t p t t c k k g h d v r c l g p l v s l p h f y a p e y q t g v g l n p e k h e l f e p l t |     |
| OforSNMP1 | PLVGYKRIQFNI DVHAI DKI DLNKKI PTALFVIVVCEGMELKQEVLDKVASI FKI I GAVDVVKKVI LNVLGCGCAAGAI LGYRKKSNENDVDVSPVVK                           | 480 |
| OforSNMP2 | PLEANRIQLNI PLHRTDSI DLLKNI KSTLPI I VACENELHCEYVDKI LDLFLI SIAGAKVI AVAVGGVLTATGFFFI LRRNDHTVI TELDPI AL                             | 500 |
| OforSNMP3 | VVRGVKVNCTCTETNKTSPSEASV CSVLKSLIFANMTEH... EPGI FKAYFRYKNNINGRYRI NSGI S.....                                                        | 190 |
| OforSNMP4 | VLRGFKRAQANI FLSKTDVLSI LNVSEGLFEVFWVEEGL ELDDKDLTP HRLVTLNAYFAII RVLIVAG.....                                                        | 118 |
| Consensus | p l r g y k r i q n i l h t d i d i l k n i l l p v l w v e e g m e l q e y l d k i a l f i i a d k w i l v a g g a g r k p           |     |
| OforSNMP1 | KPAQI TPLEVQTLPR                                                                                                                      | 495 |
| OforSNMP2 | KPTGKSAKTEHVI EK                                                                                                                      | 515 |
| OforSNMP3 | .....                                                                                                                                 | 190 |
| OforSNMP4 | .....                                                                                                                                 | 118 |
| Consensus | kp g                                                                                                                                  |     |

**Figure S7.** The multiple sequence alignment of *O. formosanus* putative SNMPs. There is a 33.62% amino acid similarity between all the putative SNMPs. Sea green, pink, and black highlights are applied to the same residues, signifying 80%, 90%, and 100% similarity, respectively.

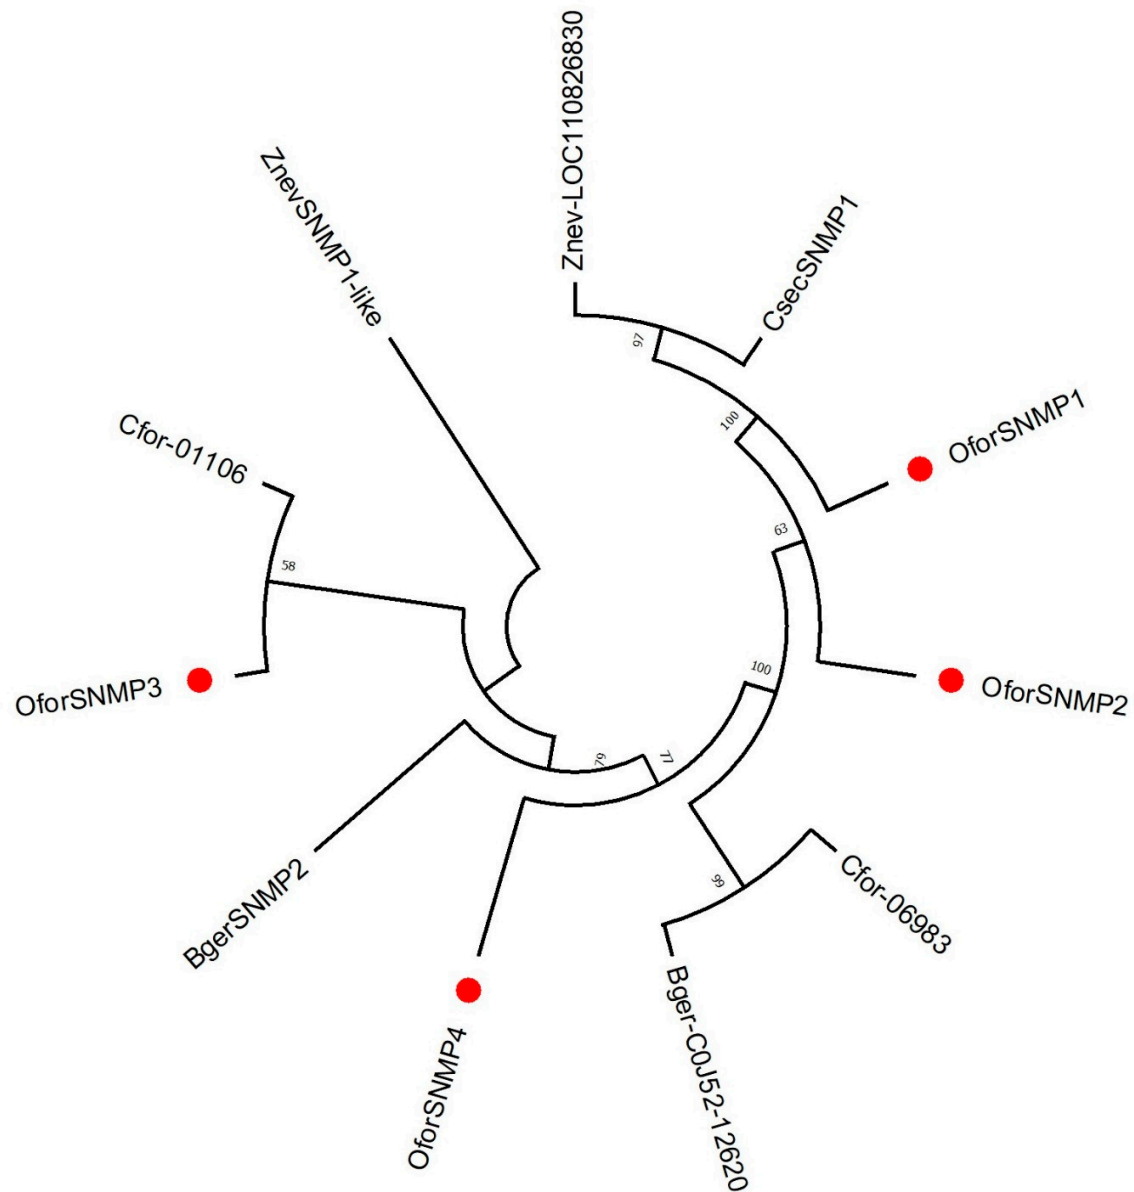

**Figure S8.** Phylogenetic tree of identified SNMPs with the SNMPs from different insect species. The identified SNMPs are marked red.

The percentages of bootstrap is shown in black color. The phylogenetic tree of 4 putative *Ofor*SNMPs was constructed by using the sequences from the insect species are; *Blattella germanica*, *Coptotermes formosanus*, *Zootermopsis nevadensis* and *Cryptotermes secundus*. GenBank accession number for all GRs genes are; *Bger*SNMP2; PSN50836.1, *Cfor*-01106; GFG35002.1, *Znev*SNMP1-like; XP\_021919116.1, *Znev*-LOC110826830; XP\_021913553.1, *Cfor*-06983; GFG37744.1, *Bger*-C0J52-12620; PSN43241.1 and *Csec*SNMP1; XP\_023702700.1.

**Gene Sequences;** Chemosensory genes identified in the transcriptome assembly of *O. formosanus*

***OforCSP***

***Odontotermes formosanus* Chemosensory Protein 1 (*OforCSP1*) (OR651283)**

**Nucleotide Sequence**

ATGTGCAGCAAATGTTCTCCTAGCCAGAAGAGTATGCTAAACGTAGCAGT  
GCAGCACATTCAAACCAGCCCTCCAGAGCAGTGGAATCAGCTGCTGGCAA  
CTTTCGATCCTGACGGGAAGAAAGCTGCAGAATTTATTGCTTATCTGGCG  
AAACCTTAA

**Amino Acid Sequence**

MCSKCSPSQKSMLNVAVQHIQTSPPEQWNQLLATFDPDGKKAAEFIAYLE  
KP \*

***OforOBPs***

***Odontotermes formosanus* Odorant Binding Protein 1 (*OforOBP1*) (OR651388)**

**Nucleotide Sequence**

ATGTTTCTAGTTCCTACAGCTTTTGTCAATTTCTGTGTAGCCTCAGTCAT  
GGCAGACTCTCGGTTTGATGGACTGGACGACAATCAGAAGGCGATGATGA  
AAATGCTGCGCGACACTTGCCTGAAGGAAAGCGGCTCAGAGGAAGGTCTC  
ATTCTAGGAGCCATGAAAGGCGACTTTGCCGAAGACGACAAGTTAAAGGC  
GTACATGGCATGTACCTTCCAGCAAGTTGGAGCGGTAAGTACAAAAATCT  
TACCCATCTGCAGGTACGTAGTTCAGATCCCAGCCAAGATGTCTATTCTG  
AAATTGTGGTACAGTATCTGA

**Amino Acid Sequence**

MFLVPTAFVIFCVASVMADSRFDGLDDNQKAMMKMLRDTCLKESGSEGL  
ILGAMKGDFAEDDKLKAYMACTFQQVGAVSTKILPICRYVVQIPAKMSIL  
KLWYSI \*

***Odontotermes formosanus* Odorant Binding Protein 2 (*OforOBP2*) (OR651389)**

**Nucleotide Sequence**

ATGAAATTAATAAGACATCTGAAGTTACTTCTATTGATTGTTGTGGCCAA  
CGTCTGGGTCTGCACTGCGGATTCGGCCCAAACAAAAACGTACAGGAGG  
CCCAAGCAAAGTGCCAGGAGGAACACGGAATAACTGATGAAACATTTTTG  
GAAATGCGGGACAAAGAAATGATTCTGGAGGATGAATCAAACGAATCTCA  
CAAGTGTTTCATACAATGCATGCTGATTCATCTTGGAATGATACAGGACG  
GCCATTTTGACGTCACAGCGGTGATGAATATTGCCAAACCGCTGCTGGAA  
AGTGCTGAAGAACGTGGTCGAGAGGTGAATGAAGAGGGTCTTAAGACGGA  
CATTGAAACGTGTACCGTTCAAAGCCCACAAGGTGAATGCACAGGCAGTT  
ATGAAATGTGGAAATGTCTGCAACGCATAATGTCCAGTATTATGTTGCCA  
GCATCTCAGGCAGAATAA

**Amino Acid Sequence**

MKLIRHLKLLLLIVVANVWVCTADSAQNKNVQEAQAKCQEEHGITDETL  
EMRDKEMILEDESNESHKCFIQCMLIHLGMIQDGHFDVTAVMNIKPLLE  
SAEERGREVNEEGLKTDIETCTVQSPQGECTGSYEMWKCLQRIMSSIMLP  
ASQAE \*

***Odontotermes formosanus* Odorant Binding Protein 3 (*OforOBP3*) (OR651390)**

**Nucleotide Sequence**

ATGCAGTTGCTACTTGCCGCAACAGTCATCTTTTTTGTGGGCCCCAGCTTT  
TGCAGGTTCTCCGTTGGACAAACTTGATGACGATACAAAGGCTATGATGA  
AAATGCTGCATGACACCTGTGTGGACCAAACCTGGCGTGCAAGAGAGTCTA  
ATCGAAAGTGCTAGACACGGGGACTTCAGCGAAGATGAAAATTTCAAGGC  
CTATTTGGGATGCGTCTACCTACAAACAGGAGCGCTGAATGAAAATGGAG  
AGGCAGACTATGACACCATCATCGGGATGTTGCCAGAAGTCTTAGAGGAC  
CGCGGTGGCAAAATGCTGAACAAATGCAGACATATCAAAGAGAACAGTG  
TCCAGCTACGGCCTTTGAACTGAACAAGTGCATGTACGAAGCAGATAAAG  
AGTTCTTCTTCATCTTCTAG

### **Amino Acid Sequence**

MQLLLAATVIFVGPFAFAGSPLDKLDDDTKAMMKMLHDTQVQESL  
IESARHGDFSEDENFKAYLGCVYLQTGALNENGEADYDTIIGMLPEVLED  
RGGKMLNKCRIHENSAPATAFELNKCMEADKEFFIF \*

***Odontotermes formosanus* Odorant Binding Protein 4 (*OforOBP4*) (OR651391)**

### **Nucleotide Sequence**

ATGAGGAGCGGTTTAAGTCTCATCTTTCTGTTTGCCACTGCTCACTGTAT  
TCTGGGAGAATCGACCCAGAGCTTTAAGGATGCTGTGTCACTAGCAC  
AAGAGTGCATGCCGCAGGTTGGGGCGACAGAAGATGACTTCCAGACGGTG  
ATCCACAGGAACCGCCTGGCCACTCGGACCGCCAAGTGTCTCCTGGCCTG  
TGTCTACGAAAAGTTGGGCGCATTCGCAAATGAAGGTCCTTACTGGACG  
AAGACCACATCATGCCTATTATGGACAGGCTGTATGGATTTAGAGAATTC  
AAGACCGTGATGAGGGCCCAAGTGGTACACAACTGTGTCAATGAAGTGAA  
CGGAAGAGACACTGACACATGTGAACTGGTGATGCACGTCCTGCACTGTA  
TAATCGAGCACTACTGA

### **Amino Acid Sequence**

MRSGLSLIFLFATAHCILGESTQSFKDAVSPLAQECMPQVGATEDDFQTV  
IHRNRLATRTAKCLLACVYEKLGAFANEGHLLDEDHIMPIMDRLYGFREF  
KTVMRAQVVHNCVNEVNGRDTDTCELVMHVLHCIEHY \*

***Odontotermes formosanus* Odorant Binding Protein 5 (*OforOBP5*) (OR651392)**

**Nucleotide Sequence**

ATGGACCGCAGTGCGATAGTTTTTCGTCTTTCTGCTGCTTCTGGGTGCTGC  
TTTCCTGCGGGAAAGCTTTGCGGGGCCGAGCCAAGCCCAATTGAAGCAAG  
CGCTGAAAATTGTACGAAATATCTGTCAGCCGAAATCTGGAGCCACCACA  
GCCGACATCGACGGAATTAGGAAAGGAATATTTCCCGAAAACAATGAAAA  
ACTTCAGGAATACTGCAAGTGCATCCTTGACCTCTTAAAAATTATGAAGA  
ACGACAGATTTAATCCGGATGCTGGTTTGGAGAATTTAAAAAAGCTGCCC  
GAAGAATTGCGTGAACCCCTGAAAAAAGGTGTCACCGAGTGCCGCAAAGC  
AGACGAAGGATCCAAATCGGGAAGAGAAGCTGCATACAAAGTCGTCAAGT  
GCATTTACAATACAATACCACAAGACTTCGTATTCCCGTGA

**Amino Acid Sequence**

MDRSAIVFVFLLLLGAAFLRESFAGPSQAQLKQALKIVRNICQPKSGATT  
ADIDGIRKGIFPENNEKLQEYCKCILDLLKIMKNDRFNPDAGLENLKKLP  
EELREPLKKGVTECRKADEGSKSGREAAYKVVKCIYNTIPQDFVFP \*

***Odontotermes formosanus* Odorant Binding Protein 6 (*OforOBP6*) (OR651393)**

**Nucleotide Sequence**

ATGGGAATGATGCAGACGATAAAGAACGGAAAGTACAAGCCGGACGCTGC  
CATAAAACAAGCCAAGATGCTGCTGAGTGGTGAAACCAGGGACAGTGTGA  
TTAATTCGATGGAGAAGTGCCGAAACGCGGGGGATGGAATAGAAGACACC  
TGTGAATTGGCCTTCGTCACAACAAAGTGCATTTACAATGCAGATCCTGT  
GAATTTCTTCTTCGCTTGA

**Amino Acid Sequence**

MGMMQTIKNGKYKPDAAIKQAKMLLSGETRDSVINSMEKCRNAGDGIET  
CELAFVTTKCIYNADPVNFFFA\*

***Odontotermes formosanus* Odorant Binding Protein 7 (*OforOBP7*) (OR651394)**

**Nucleotide Sequence**

ATGGCGCTGCTTCGCTGCTTGGTCATCCTAGTATCTTCTCAGCTCTTGGT  
GCTGGTGAATGCAGTACCAGCGTCTAACGCTAAGGTGGACATGAAAGAAA  
TTATGAATAAATGCAATGAGAGTAACCCTATAGACCAAGCCTACCTGGAT  
GAGTTAAACATGACTGGCAGTTTTTCCCGATGAGAACGTTAGACCTGCCAA  
GTGTTTCATTCGGTGTATTTTTATGGAACTGGACTGATGGATTCTGAAG  
GCAACTTGCTAGCTGACAAGTTGAAGGATGTCTTCAAACATCACCAGGAA  
TCTGTGGTCAACAAAGTCGCCGACCTGGATAATTTTGTGGATGCTTGTAT  
AACTAAGAATGCCGATGTGAAATGCCAGTGCGAGAGGGCTTATCTCTTCT  
CCAAGTGCCTGATGACACAGGAGATATTGAAATACGAAGACCACAGCAAG  
TTGAGTGGTAAGAGAGATGAAGGGGGATACTGA

**Amino Acid Sequence**

MALLRCLVILVSSQLLVLVNAVPAASNAKVDMKEIMNKCNE SNPIDQAYLD  
ELNMTGSFPDENVRPAKCFIRCIFMETGLMDSEGNLLADKLKDVFKHHQE  
SVVNKVADLDNFVDACITKNADV KQCERAYLFSKCLMTQEILKYEDHSK  
LSGKRDEGGY \*

***Odontotermes formosanus* Odorant Binding Protein 8 (*OforOBP8*) (OR651395)**

**Nucleotide Sequence**

ATGATGTTTCATGAAAATTTTGTTTATTTCTCTTGGTGTCTCCTGCTACCT  
TTCAACTGCTGTGCCTACAAGCGGCCATTCAGCTGTAGAAGTCGTGAAGT  
TTTGCCAGAATCTAACAGGGATAAGTGACGCGGAAGTTGAGGTTCTTCAG  
AAAACGGATATAGCAAATAATGAGTCCATAGAGGCGCAGAGGTGTTTTGT  
GGCTTGACGCTTAGCAGAAGAGGAGTGATGAAGAAGGGGAATCTTATCG  
TTGACGTCATGGTTGAATTTTCGAAAAGAGCGTTTGCAGACGAGGGCCTA  
AAGTTCGACGAAGCAATGTTTCAGAAAGGGCGTTACCGATTGCAACAACAC  
AACTGGAGACGGCAAATGTATGAAGAGCTACAAGACATGGAAATGCTTCC  
TGGAATTTTCAATGAAGACAATGATGTGTGTGGTTTTATTAGCAGACGCA



AGAAGAGATAAAGGGACCAAAGTAACCTTATGGCAGTCTTCTACGTCTGC  
AGATGCCGATTAA

#### **Amino Acid Sequence**

MMFMKILFISLGVSCYLSTAVPTSGHSAVEVVKFCQNLTGISDAEVEVLQ  
KTDIANNESIEAQRCFVACTLSRRGVMKKGNLIVDVMVEFSKRAFADEGL  
KFDEAMFRKGVTDNNTTGDGKCMKSYKTWKCFLFSMKTMMCVLLADA  
RRDKGTKVTLWQSSTSADAD \*

***Odontotermes formosanus* Odorant Binding Protein 9 (*OforOBP9*)** (OR651396)

#### **Nucleotide Sequence**

ATGGACAACCTTACAGCTACTGGTAATTTTCATTTTCAGCGCTGCTGCTGT  
AACAGGCTTCCAGCTGAGATCCAGTCTCGATGGTTCCAGATCAGAAGATT  
TATTAAACAGCGGTAGTAGGACAATACTGTCCAGAAACAGGAGAGACACT  
GACCACGAACTGGCACACAGTGC GGAGATGTGCTGCAATATGAAGCATCA  
AAAGACTATCAATGAAAAGGAAATGGAATGTATGCAGGAAGCCAGTTCTA  
AATTGTCAGTAACAGTCACTGAAGAAATAATTGCAACCCACAGGGATTCC  
AACGAGACAGCTTGTTTTTTGGACTGTATTCTACGCAAAAGCAATGCACT  
GGATGGCGGTGGACAGATAATAATGGGCGCAGCTACTGAAGCCTTAGCAC  
AGTACCCTCCCTTTAAGGATCAAAGCTTACTCGATAAAGTGACAACGACT  
TGTGCGAATTTACCTGGAGTAAACGGCGGGGCTTGGAGAGACCTACGT  
GTGTAACCAAGCAGCAATGCAATTCGTGAGGTGTGCGCATGACATCAAGA  
TACTTAACTGTCCGGTAGAGAATCAGATTCAATCTGCAATGTGTACGAAA  
TTTTGGGAGGAAGTAAAGGCACAGAAGCAGTGA

#### **Amino Acid Sequence**

MDNLQLLVIFISAAAVTGFQLRSSLDGSRSEDLLNSGSRTILSRNRRDT  
DHELAHSAEMCCNMKHQKTINEKEME CMQEASSKLSVTVTETIIATHRDS  
NETACFLDCILRKSNALDGGGQIIMGAATEALAQYPPFKDQSLLDKVTTT  
CANLPGVNGGGLGETYVCNQAAMQFVRCAHDIKILNCPVENQIQSAMCTK  
FWEEVKAQKQ \*

***Odontotermes formosanus* Odorant Binding Protein 10 (*OforOBP10*) (OR651397)**

**Nucleotide Sequence**

ATGATACGGATATTATTTGTAATCCTCGGGGCCGCTCTTTGTCTAACTGG  
AGTCTCTCCTTCGGATGAACCGCCCGCTGCTTTTCAAAAGTGCCAAACCG  
AGCATGGAATTCCTGACCTTCAAAGTATCATGAATCCCCGATCAATGACG  
CTGAATGACGTCTCAAATGAGGCTGGCAGGTGCTTCGTGGAGTGTCTAAT  
GAGAGAATTTCAAATTCTTAAGGGGAACAAGCTTGAGAGCCGTAAGGTGT  
TAGAAGAGGTTAACAATATGGTACAGTTCGCCAGATCGCAAGGAAAAGAG  
TTTGATGTGAACAACTCAAGTCCTCACTGACAGCATGCGGTAACCAAGG  
TGGTGAGGGGAAGTGCATGAAGACTTACAAGATGTGGGAATGCATGAACA  
ATGTTGTTCGACAGGTGAGACCAGCAGCTACATAA

**Amino Acid Sequence**

MIRILFVILGAALCLTGVSPSDEPPAAFQKCQTEHGIPDLQSIMNPRSMT  
LNDVSNEAGRCFVECLMREFQILKGNKLESRKVLEEVNNMVQFARSQGKE  
FDVNKLKSSLTACGNQGGEGKCMKTYKMWECMNNVVRQVRPAAT \*

***Odontotermes formosanus* Odorant Binding Protein 11 (*OforOBP11*) (OR651398)**

**Nucleotide Sequence**

ATGAAGACTGTGAAACCTGCACTAGTGGCGGCCATCTTGCTGTTGCTGGG  
AATGGCAGACCTCGCTGTGGGGTTGACAGGCCGTGCTTTTGAAAGAGCCA  
AGGAAGTCGATGAGAAATGTAGAAACGAAAACCAAGTTGAGAGAGCGTAC  
TTTGAAAAATTTATTAAAGCACGTATTGAAGAAATAGATCCTCCAAACAA  
TTACAAGTGTTTTATTAAATGCGTCATGGTGGAACCTATTATCTCTAAACG  
AAAAGGGAGAATTCAACATCGACGAAGAACTGCAGAATGTACCACCGGAG  
ATTGTGGAAGAGGGACATCGTATAGTCAAGGCTTGCCAAGACACACCCGG  
AAAGGACTTATGTGACAAGGCTTACCAGATGCATAAGTGTTACCATAGAG  
AAAATCCGGAGCTGTATTCGCTTGTGTTACATTACTGGGAAAATGCATCC  
CAATAG

### **Amino Acid Sequence**

MKTVKPALVAAILLLLGMADLAVGLTGRAFERAKEVDEKCRNENQVERAY  
FEKFIKARIEEIDPPNNYKCFIKCVMVELLSLNEKGEFNIDEELQNPPE  
IVEEGHRIVKACQDTPGKDLCDKAYQMHKCYHRENPELYSLVLHYWENAS  
Q \*

***Odontotermes formosanus* Odorant Binding Protein 12 (*OforOBP12*) (OR651399)**

### **Nucleotide Sequence**

ATGGCTGGGTCAGCAATCATGTATATGGTAATGACAATTTTGGCCACCGT  
ACTGTTGGGGACATCTGATGCACTGACTATGGACCAAGTGCGGCAAGCGG  
CAAAAATGATGAGAAATACATGCTTGACGAAAATAGGAGTCAGTGCAGAA  
AATGTGGATGCTGCTTTAAATGGTCAGTATGATCCTGGTGACAGAAAAGC  
TAAGTGTTACACGAAATGTGTCATGGGGATGATGCAGGCGTTGAAGAATG  
GAAAGTACAATGCTGATGGTTCCATTTCAATGGCAAAGGCGATGCTGCCC  
AGCGGTATAGCTGAAAGGATGGTCGCTTCCATCGAGAAGTGCCGCGGTGA  
ATGGGACAAATATGAGGACGACTGCGATGCGTCTTTCGCAGTAACAGTGT  
GCATATACCAAGCTGATCCCGAGATTTTCTTCTTCTCTTAA

### **Amino Acid Sequence**

MAGSAIMYMVMILATVLLGTSDALTMDQVRQAAKMMRNTCLTKIGVSAE  
NVDAALNGQYDPGDRKAKCYTKCVMGMMQALKNGKYNADGSISMAKAMLP  
SGIAERMVASIEKCRGEWDKYEDDCDASFAVTVCIIYQADPEIFFFS \*

***Odontotermes formosanus* Odorant Binding Protein 13 (*OforOBP13*) (partial) (OR651400)**

### **Nucleotide Sequence**

ATGAACTCCGTACTGGTTAACAGGCAGCTGACCGTTGTGGAAAATGCAGG  
GGGCTTCAAATGTTTCTTGCAATTGCCTTTATTACAGGTACAACCTGGATGG  
ATGAAGAGGGAGGATTCCTTCTGCGCAACATGAAAAGCGCTTTGGCGACT  
ACCAGACTGGATGATCTCACTGCT

### **Amino Acid Sequence**

MNSVLVNRQLTVVENAGGFKCFLHCLYYRYNWMDEEGGFLLRNMKSALAT  
TRLDDLTA

### ***OforORs***

***Odontotermes formosanus* Odorant receptor 1 (*OforORI*) (OR651429)**

### **Nucleotide Sequence**

ATGGAGCTACTAACACAAAGTATGATTAAATTCCTTGGTGTAGAGGAACA  
TTATGGGGCAAACAAATTGCTTCAATTCAATCTTCACAGGCTACGTATTC  
TGGGTGTCTGGAAGTGGGATGCGCCTCAGTGGAGACTGCATAAAACATTT  
GCATTTTAACTATTATATCACTGATTCTGTGTGATGTAACACTAATTTG  
TGATACCTACATCTACATCACTGACTTAGAACGCCTAGCAAATTTACTCT  
TAAGTACTATATTCCTGCGCTTCTTGCATTCAAGAATACTTACATGCTT  
ATTAGAACTGATAAGGCTTCAGAACTTATTGATCAACTGCAAAACAAATT  
TTTCACGGATGACCGACTGCCCACATCACAGCAGACAATGATCTTGAATA  
GATACGCAGCAAGAGCAAAGCTCTATACTATCATAAGAAGCAATTTGGCA  
ATCAGTATAGCTATATTCTGGGTTTTATATCCAATTAAGGAAATGTTGGG  
GGAGTATGCAGAAGAACTACATGACTCACAGGACAGTACTGATGTGAAAT  
CTAACAGCAACAGAACTGTCATTTTGCAGTTGCCATATGTTGCGTACTAT  
CCTTACGATGTGGAACATAATGTTCTTAATTTTCATTCTGACATACTTCTT  
TGAGTCATTTGTTGCATTTTCTGTTTTTGTGGAATGCCTGCTTGGGATA  
TGCTTTTTGTTTCTGTATTTATTCATACTTCTGGGCATTTTAAAGCACTG  
CAACATGTGTTGATCCATTTGCGTGAAAACGCTAGAGAAGCACTGAAAGA  
AAATGTGAATCAACTTCAAATCCAGGAAGCCATTTGTGTGTCAGAACAAA  
TTGACAATGGTGGCAGCAGTGTGTGCACAATGGTACATCATTCAGAAGAA  
TATGCAGGAGGTATGTTTTTTTAG

### **Amino Acid Sequence**

MELLTQSMIKFLGVVEEHYGANKLLQFNLHRLRILGVWKWDAPQWRLHKTF  
AFLTIISLILCDVTLICDTYIYITDLERLANLLLSTIFTGLLAFKNTYML  
IRTDKASELIDQLQNKFFTDDRLPTSQQTMILNRYAARAKLYTIIRSNLA  
ISIAIFWVLYPIKEMLGEYAEELHDSQDSTDVKSNSNRTVILQLPYVAYY  
PYDVEHNVLNFILTYFFESFVAFSVFGMPAWDMLFVSVFIHTSGHFKAL  
QHVLHLRENAREALKENVNQLQIQEAICVSEQIDNGGSSVCTMVHHSEE  
YAGGMFF\*

***Odontotermes formosanus* Odorant receptor 2 (*OforOR2*) (OR651430)**

### **Nucleotide Sequence**

ATGGCAGTCACTAGCATGAGGCGTCTGGTCATGTACGTGGGCATCGGCAT  
CATCCTCAGCGGGTTTGCCTGGACCACCATCACCTTCTTCGGAGAGAGTG  
TGCACAAAATAAAGGACCCAGATAATTTGAATGAGACTATTTTAGAGGAG  
GTACCGCGTCTCATGCTACGTTCGTGGTATCCCTGGAATGCTATGTCTGG  
CGGAGGATACGTCGTGTCCTTCATCATCCAGATCCTGTGGCTATTTCTGG  
CTCTGTCACATGCCATGATGATGGACACTATGTTCTGCTGTTGGCTCATC  
TACACGTGTGAGCAACTCATTCATCTGAAAGAGATCATGAAGCCGCTGAT  
GGAGCTCAGTTCATCGCTGGACACTGTGGTGCCTAACTCCGCAGACCTGT  
TCCGTGCCGCCAGCACCAATACCAACGCTGCTGTACCTTCAGGTGATGGT  
GAGGGTATTCGAGCTATATACAGCAACCAGCACGACTTCTCCAATTTCCG  
ACTGAATACAGGCACCCTTGTC AACGTAAACAGTGGCTCTATTGGACCAA  
ACGGACTGACAAAGAAACAGGAGCTCCTAGTACGGTCCGCCATCAAGTAC  
TGGGTGGAGAGACACAAACACGTGGTTCGATTCGTCAGTAATATTGGAGA  
CACGTACGGGTCGGCACTGCTGCTACATATGCTGACCAGCACAGTGACAT  
TGACACTGCTCGCCTACCAGGCCACGAAGATTGACACTGTAGATGTCTAT  
GCCTGCACCGTGATCGGCTATCTAGTGTACACATTGGCCCAGGTGTTTCT  
CTTCTGCTTCTTTGGCAACCGTCTCATCGAGGAGAGCTCATCAGTGATGG  
AGGCTGCCTACAGCAGTCAGTGGTATGACGGGTCGGAGGAAACCAAGACT

TTTATCCAGATTGTATGTCAACAATGTCAGAAACCAATGAGCATCTCTGG  
AGCCAAATTCTTCACAGTGTGCTCGATTTGTTTGCTTCGGTTCTTGGTG  
CTGTAGTGACCTACTTCATGGTGCTGGTACAGCTCAACTAG

#### **Amino Acid Sequence**

MAVTSMRRLVMYVGIGIILSGFAWTTITFFGESVHKIKDPDNLNETILEE  
VPRLMLRSWYPWNAMSGGGYVVSFIIQILWLFLALSHAMMMDTMFCCWLI  
YTCEQLIHLKEIMKPLMELSSSLDTPVPSADLFRAASTNTNAAVPSGDG  
EGIRAIYSNQHDFS NFRLNTGTLVNVNSGSIGPNGLTKKQELLVRSAIKY  
WVERHKKHVVRFVSNIGDTYGSALLLHMLTSTVTLTLLAYQATKIDTVDVY  
ACTVIGYLVYTLAQVFLFCFFGNRLIEESSVMEAAAYSSQWYDGSEETKT  
FIQIVCQQCQKPMSSISGAKFFT VSLDLFASVLGAVVTYFMVLVQLN\*

***Odontotermes formosanus* Odorant receptor 3 (*OforOR3*) (OR651431)**

#### **Nucleotide Sequence**

ATGGGATACATCAAGAGGAACAGGAATACTGAGTTCTCGTGTGATAACAG  
CCTTCATCAGAGCAGATTTAAGACGACTCTCTCTCTTTTGCGACACGCAG  
GATTGATGATTA ACTACACATCGCCATCAAACTTCAAAC TTTATACACT  
ACAGTTTGTGCAGTGTGTTATTACAGTACTTGGATGTGTTCTATTATGGA  
TATGTATGTTACAGATATGATTTGACGAAAGTTATGGAGAAAAGTCGTT  
TATGGCTTCTTATGTCACTCCTAGTGTGGATGAATTTGTTTGCAGTTAC  
CGTAAACGGGATATCGAACTGCTGCTCAGACAGACAGACTGGTTTACGTG  
GGAAGAACTGCCTACCAGAGATCCTGACAGCGGATATTTGACAAAGGCTG  
GGTACATCCCGATCATCCAACGTCTTACCAAATATGCTTTTTGGGTCATC  
TTTTTTTTTCCACTTCACCCAGTCAACAGTCCGCATTGTGATCAGCCGCGA  
AATGATCATAAGTCCGTGGTTTCCGTTTCGACACATCGGCGACTTCAGTAT  
ACATATGTGCGAATACAATACAGGCCATTGCGTCACTCTTCCCAATGTTT  
ATAGCTTTTCGGCTTTCCAGCCTGTACGCTACGCTAATGATTGTACCCTG  
CAGTCAGCTGGAGAAGCTCAGAGCAGCCATGTTGGATATCAGGCAGGCAC  
AAGACAATTATCAACATCATTCAGGGCGACATACAGACATTTCGGAACAC

GTGTTCCAAAATATGCAGAAACAACAACTAAACGACTGTATATCTCACCACCA  
GCAAGTACTACGATACATGGAAATGTTGGAAGACACAATGAATCTTCCAC  
TCTGTGGACTATTCCTGATTTCTTCACAACGATGTGTTTCGACGCTCTC  
TTCATTATGATGAGTTTCAGCAATGCTGCAGATGTACTGCAGGGTCTGAT  
ATTGTATATTTATATAACTATCTGCTTGTCCCTCTACTGTTGGCTTGGA  
ACGAGCTATCAGCTGAGTGGGAGATGGTGAGTGACGCAGCCTGGGGCTGC  
GACTGGATAGGAACTCCTGTCCCATTTTCAGCGCTGTCTGGTCTTCATCAT  
TGCCTCAGCTAATAAGGGGTTTACACTGACAGCTGGCAAATTTGTTCCGG  
TCTCCAACAAAACATTGTTGAATATGGTGCAGCAATCTCTATCCTTCTTC  
ATGTTTCTTCTATATGTGAAAGACAAGAATATCCAGAACACTCAGCAAGG  
ATAA

**Amino Acid Sequence**

MGYIKRNRNTEFSCDNSLHQSRFKTTLSLLRHAGLMINYTSPSKLQTLYT  
TVCAVCYYSTWMCSIMDMYVHRYDLTKVMEKSRLWLLMSLLVWMNFVCSY  
RKRDIELLLRQTDWFTWEELPTRDPDSGYLTKAGYIPIIQRLTKYAFWVI  
FFFHFTQSTVRIVISREMIISPWFPFDTSATSVYICANTIQAIASLFPMF  
IAFGFPSLYATLMIVPCSQLEKLRAAMLDIRQAQDNYQHHSGRHTDISEH  
VFQNMQKQLNDCISHHQVLRMEMLEDTMNLPLCGLFLISFTTMCFDAL  
FIMMSFSNAADV LQGLILYIYITICLSLYCWLGNELSAEWEMVSDAAWGC  
DWIGTPVPFQRCLVFIIASANKGFTLTAGKFVPVSNKTLLNMVQQSLSFF  
MFLLYVKDKNIQNTQQG\*

***Odontotermes formosanus* Odorant receptor 4 (*OforOR4*) (OR651432)**

**Nucleotide Sequence**

ATGCTTATGACAGATTTCTTACTGTTCCAGATGCCGCTCAATGTGGAATC  
TGCGATGCTAATGGGATATTTAACAGTTGTGATTTCTCAGTTGGGCCTGT  
ATTGTACATTAGGGTCCAATTTAATGATCCAGAGCGAGGAGGTGTTCAAC  
GCCGTGTACGACAGTGACTGGTACAACCAGTCGCAACAATACAAATACTG  
CACCAGGATGATGATCATGAGAGGCCAGAAGCCGGTGAAAATCACCGCTG  
GCAGGTTTCGGAACCTTTGTCCCTTCCCCTCTTTGCTTCGGTGAGTGTAAG  
TGGAAAAATGGTAATAAACGTAGCTCGCACTATTAG

**Amino Acid Sequence**

MLMTDFLLFQMPLNVESAMLMGYLTVVISQLGLYCTLGSNLMIQSEEVFN  
AVYDSDWYNQSQQYKYCTRMMIMRGQKPKITAGRFGTSLPLFASVSVK  
WKNGNKRSSH\*

***Odontotermes formosanus* Odorant receptor 5 (*OforOR5*) (OR651433)**

**Nucleotide Sequence**

ATGACTGGATCAAAGAAGAAAGAAAGTCAAGTTTCTGATACAAATGACAC  
ATTAAAAAGTGAAGAAGAAATTCCAACGTGGGAAGCGAAAATCATGACTA  
TCGTTCGTACCCCTGAATGTAGTTGGTCTCCTTCCTCCTCCCAAATCTTCG  
TCATTCATCAAATTGATCTACAAAACCTTTCAGAGTATTCATACATATAGT  
TTACGCGTTGACAGCGATAGCGGAGTTCACTGCCTTCGTGGTTTACTGGG  
GAAATCTTCCCGTAGTTGCCACCACTATGGCTGCCATGTCTGGTTTACTC  
TTATCAATGACCTCTTCCATAAATTTTCTGCGCAACAGAAAGAAATTCAT  
AAGCCTTATAGATATGCTGAGAACAGAATTTGTTGCCAAATTGAAACCAA  
AGTATATGAACTTATTTTAAAGGCTGAACGTGACATTTTACTCTTTTCA  
TTATTCTTATACCCTGTAGGTTTAAAGTATTTCTTTTACTTGGATATTAGC  
GCCCTTTTTTAAATAAGAACCCCCTATATAACTTTAAAAATGAAAATAATG  
TCACAGAAGGAAGTAGTGTGGAGAATTTAATTTTTGTGATGTGGTTCCCT  
TTTGAATTTGACAAGTCCCCACAATTTGAAATAGTAATAGCGTTGCAGGT



TTTTGTTATGACTTTTGCGGTAATAATGGTATTTGCACTTGATTTAGTGT  
TTCTGTCTCTGATGAGACATGCCGCTGCTCTGTAAAGGGTGTTGCGTGCC  
ATGCTGAATGATATGCATGAGAACGTCACAGAAAACAATTTGCATACAAC  
AAGGTACGTAGATTCTTTGAACAGTGACACTGATGTCAGATTCCAGAAGA  
ACGGCCCAGTGTCATAAATTATCCCCCTTTACCCATTCTTTGAGCGGA  
GATACAGAGAGAAATTCAAAGCTTCTTGTTGAGATGGAACGCCTGGAAAA  
TGAACACTTGGAGGAAGATATTTCCGGCAGTACCTAGTTGAATGCATCA  
GATATCACCAGGCTGTATACGCGTTTGTTGATCAACTGAACGAGGTTGTA  
AGTGCTGTAACCTTTCTTGAAGTTACTTAACTTTCCGTTAGTGATATGTAT  
GACAGCATTTTCTGATGACGCAGTCGATAGACAGCCAGCAGCAGTTACTGA  
GATTCCTCTCCATGTTTCGCTGGGGGTGTCTCTCTAGTAACGTCATATACG  
TGGTTCGGACAGCAAGTAATTAACGAGAGCGAGGAAGTAGCGACAGCTTT  
TTACAACATTGACTGGTACAACCAGACGCCAGAGTTCAAACGTCCTGCTAC  
CTCTAGCCATCATGCGCGCGTCGAAACCCGCCAAAGTTGAGGCCGGAGTG  
TTCTTTGACATGTCTTTTGTCACTTTAGCTGCGATTATGAATACGTCTTA  
TAAGATTTTCATGATGCTAATCCAAGTCAAGACGCCTAA

#### **Amino Acid Sequence**

MTGSKKKESQVSDTNDTLKSEEEIPTWEAKIMTIVVTLNVVGLLPPPKSS  
SFIKLIYKTRVFIHIVYALTAIAEFTAFVVYWGNLPVVATTMAAMSGLL  
LSMTSSINFLNRKKFISLIDMLRTEFVAKLKPKYMKLIFKAERDILLFS  
LFLYPVGLSISFTWILAPFLNKNPLYNFKNENNVTEGSSVENLIFVMWFP  
FEFDKSPQFEIVIALQVFVMTFAVIMVFALDLVFLSLMRHAAALLRVLRA  
MLNDMHENV TENNLHTTRYVDSLNSD TDVRFQKNGPVSLNYS PFTHSLSG  
DTERNSKLLVEMERLENEHLEEDIFRQYLVE CIRYHQAVYAFVDQLNEVV  
SAVTFLKLLNFPLVICMTAFQMTQSIDSQQQLLRFLSMFAGGVSLVTSYT  
WFGQQVINESEEVATAFYNIDWYNQTPEFKRLLPLAIMRASKPAKVEAGV  
FFDMSFVTLAAIMNTSYKIFMMLIQLQDA\*

***Odontotermes formosanus* Odorant receptor 6 (*OforOR6*) (partial) (OR651434)**

**Nucleotide Sequence**

ATGGAGCGTATCAACGGTAGCACTAAGGCTAACGCGTCAGGCTGTAATAA  
TCTACACGAAAGTCGTTTTAAGACACTTCTCTTTTTTCATTCGACTGGGCG  
GACTTCCATTTAAGTTACAGTCAGTGTCAAGAATTTACACAGCATACAGT  
GCAACCATTATCGTGTGTTTTTACATTACTACTGTATGTCTTATCATGGA  
TACGTTTCGTTCATAGAGGCCAACTGGTGTACGCTATGATGAAATTGCGCA  
TAATTCTTGTATTCACAGTAGCTGCATGGATGCACCTCAGTTTCAGTTAT  
CGCAAACGTGATATCGAGCAACTTCTTTTTCTGACCGATTCTTCACGTG  
GGAGGACCTGCCTACCAGAGATCCTGACACCGGGCATTTAACAAAGGCTG  
GGTACATACCGATCATCCAGGATCTTACTAAAAACATAAATGTATTCATG  
ATTGCATTCAACATTATCCAGAGTACTGTGCGCATGGTGAAGAACCATGA  
TATGTACCTCACGAGTTGGTACCCTTTTGACGTGTCAGTGAGTCCAATGT  
ATGAAATCGCAAATCTCACACAGGGCATAGCAGCACTATTCGGATTATGT  
ATATTACTTGGGTTCCAAAGCATAACGCTACGCTAGTCTGTGTAGCCTG  
CAGCCAGCTGGAGAAGCTCAGACTGGCGCTGTTGTATATCAGACAGACAC  
ACGTCATATCAGAACATCAATTTCGGAGATGAGATACAACAGCCAGCTGTT  
CACGAACAACCAAACCTTTCTGATGAATCGTCCCGTCACATGCAGGAACA  
ACTTAACAACCTGCATACGTCACCACCAGCAGATAAAGCGATACATGGAAG  
CACTAGAAGACACAATGAATATCCCTCTATGCGGTATACTGCTCATTTTC  
CTAATACTAATGTGCTTTGGCGCTTTCTCCATCGTCACGAGTTGGGGAGA  
TCACAACGATATATCGCAGGCTGTAGTAGTGTACATTTATGCAGCGGGAT  
CTGTATGTTTATACTGCTGGCTTGCGAGTGAGCTGTCAGAGCAGGCAGAA  
AATGTAAGAGACGGTGTCTGGGGCTGCGACTGGGTAGGAACTCCTGTCCC  
ATTTACAGAGCTGTCTGGTCTTCATCATTGCTACAGCCAACAAGGGGTTCA  
CAATGACAGCTGGGAAATTTGTTCCAGTGTCCAACCTCTACATTGATGAAT  
GTAAGAATGCTAATCGTTCCTCTAATACGAAGCAGCAG

### **Amino Acid Sequence**

MERINGSTKANASGCNNLHESRFKTLFFIRLGGLPFLQSVSRIYTAYS  
ATIIVCFYITTVCLIMDTFVHRGQLVYAMMKLRILVFTVAAWMHLSFSY  
RKRDIQQLFLTDSFTWEDLPTRDPDTGHLTKAGYIPIQDLTKNINVM  
IAFNIIQSTVRMVKNHDMYLTWYPFDVSVSPMYEIANLTQGIAALFGLC  
ILLGFQSIHATLVCVACSQLEKLRLALLYIRQTHVISEHQFGDEIQQPAV  
HEQPNLSDESSRHMQEQLNNCIRHHQKRYMEALEDTMNIPLCGILLIF  
LILMCFGAFSIVTSWGDHNDISQAVVVYIYAAGSVCLYCWLASELSEQAE  
NVRDGVWGCWVGTPVPFQSCLVFIATANKGFTMTAGKFVPVSNSTLMN  
VRMLIVPSNTKQQ

### ***Odontotermes formosanus* Odorant receptor 7 (*OforOR7*) (OR651435)**

#### **Nucleotide Sequence**

ATGACCAAACAGTTCACGTGGATGGAAGTTCACCAACCAGGGAGCACGACAC  
TGGCTCACTCACCATGGCCGGCTGGATTCAGCGTATCCAGCCTTTGGTGT  
GGAAATTAAATTTCTGCGACTGGGGGACTCACTTACTATACTTCATCCTG  
CGTGGTGTTACAAGTGATGGCAAACCGTTTTTCTTTAACGCCTGGTTCCC  
GCTTGATACCGACGACACTTCTACTTACTTTCTTGTACTCATCATGCAGA  
CTCTGGGCAGTGTGATGCTAGGCACAACACTGTTTCGCGGTGATGGGACTG  
TATGTGGTGCTGGTATCTGTGGGCTGCACCCAGCTGCAGAAATTGCAGGC  
GGCATTGGGCGAATTCAGGCAGCAGGAACAAGAAGAGATGTACACCATTC  
TGGTCAGATGTGTGCAACACCATCAGCAAGTTCTGAAATACATGAAGGAG  
CTAGAGCAAACATTCAGCCCTGTACTCTTCGGTCCTTTCCTGTCGGTGGT  
GGCAGCACTCTGTTTTACCGCCTACACTGCAATAACACTGGGCGGAAAGT  
TTGTGGAGATTATACAGATCCTCCTCATTACCGGTGCCATGATGTTTCAG  
ATACAGGCTGTGTGTTGGTTTGGTACTGAGCTAACTAAACAGTCTGGCAG  
AGTGCGGGATGCAGCATGGGAGAGCGACTGGGTGGGTGCGCCTGTTCCCT  
TCCAGCGGTCCATCATATTCATGATTTGCGTCTCAAAGGAATTCAAACCTC

ACAGCTGGCAAGATTATCCCCGTGTATCAAAGCACTGTCATGGTGGTGCT  
GAACCAGACCTATACATATCTGATGGTACTCCTGAACTTTGTGCAAAAAT  
CCAGTACATAA

**Amino Acid Sequence**

MTKQFTWMELPTREHDTGSLTMAGWIQRIQPLVWKLNFCDWGTHLLYFIL  
RGVTS DGKPPFFNAWFPLD TDDTSTYFLVLIMQTLGSVMLGTTLFAVMGL  
YVVLVSVGCTQLQKLQAALGEFRQQEQEEMYTILVRCVQHHQQVLKYMKE  
LEQTFSPVLFGPFLSVVAALCFTAYTAITLGGKFVEIIQILLITGAMMFQ  
IQAVCWFGTELTKQSGRVRDAAWESDWVGAPVPFQRSIIFMICVSKEFKL  
TAGKIIPVYQSTVMVVLNQTYTYLMVLLNFVQKSST\*

*Odontotermes formosanus* Odorant receptor 8 (*OforOR8*) (OR651436)

**Nucleotide Sequence**

ATGGGTTACAGTTTGACAAGTGCTACACGGGCATCAGATTTTGCACATTC  
TGCAGGATATGTCGTACATCTTATGGTGGAGACCGGAATCATTGCTGGC  
TGGCCACTGGTCTTATTACACAGGGCGACATAGTTGGGGAAGCCGCGTAT  
TCGTGTGACTGGTACAACGAACCAATCAAATTTCAACGCTCCATAATGAT  
CATCATGATGCGCACGAAACGGCCCGTG CAGATATCAGTGCGACCTGTAG  
GAACGCTATCCTTGGAGATGTTTGCTACCATCCTGAACTCCTCTTACTCA  
TATTTCACTATTATGAGAGGCATGACAAACTGA

**Amino Acid Sequence**

MGYSLTSATRASDFAHSA GYVVHLMVETGIICWLATGLITQGDIVGEAAY  
SCDWYNEPIKFQRSIMIIMMR TKRPVQISVRPVGTL SLEMFATILNSSYS  
YFTIMRGMTN\*

***Odontotermes formosanus* Odorant receptor 9 (*OforOR9*) (OR651437)**

**Nucleotide Sequence**

ATG TTCAGCACCCGTGGAGCTATTGTGTCACTATGTATTCATTTAGTCCA  
ATCAACAATCCGCATCGTGACAAACCACGAAACGATACTAACTGTGTGGT  
ATCCTTTCGACTGGACTGTTTCGCCGTACTACGAACTGGTTAACATCTCA  
CAGTGCTTTACAGCATTACTAGTAACGGGTGTGACATTCGGTTTCCCGTC  
TCTGTGCGCTACTCTGACTGCTGTGGCCTGTGCTCAGTTCGATAAGCTAA  
AGGCGGGCATATTGGATATCAGACAGCAACATATCACATCTCAACAAGGG  
CTGGAAATTGAACAAGTTCATACAATTGCAAACGTGAATTGCAAGCCAA  
GCTAAGGGAGTGTATTCGATACCATCAGGAAATATTGGCGTTCATGAAGC  
AAATGGAAGACTCGCTAAACACCGTTCTGTGTGGCCACTTTCTGATTATG  
CTGGCCACAATGTGCTTCGCTGCTTTTTCTGTAGTTACGAACTGGGGAGA  
TTATGCAGATATGATTCAAGCAGTTATAATTTACATAACGTTCTCCAGTG  
ACGTGCTTCTGATCTGCTGGTTTGGAACCTCAGTTGACACAACAGGCAGAC  
AGTGTGAGAGACGCTACATTCGGGTGCGACTGGGTGGGAACTCCTATTCC  
ATTTACAGAGATGTCTAATGTTTCATCATCGCTATAGCTAACAAGGAGTTCC  
AACTGACAGCGGGAAAGTTTGTTCTGTATCGAATGTGACCATGATGAAA  
ATAATGCAAGAGACTCTGTCCTTCTTCATGTTTCTGCTTCAAGTGAAAGA  
CAAGAATGAAGAAACGAAACAGGGTTAA

**Amino Acid Sequence**

MFSTRGAIVSLCIHLVQSTIRIVTNHETILTVWYPFDWTVSPYYELVNIS  
QCFTALLVTGVTFGFPSLCATLTAVACAQFDKLKAGILDIRQQHITSQQG  
LEIEQVHTIANCELQAKLRECIRYHQEILAFMKQMEDSLNTVLCGHFLIM  
LATMCFAAFSVVTNWGDYADMIQAVIIYITFSSDVLLICWFGTQLTQQAD  
SVRDATFGCDWVGTPIPFQRCLMFIIAIANKEFQLTAGKFVPVSNVTMMK  
IMQETLSFFMFLLQVKDKNEETKQG\*

***Odontotermes formosanus* Odorant receptor 10 (*OforOR10*) (OR651438)**

**Nucleotide Sequence**

ATGCGTGAAGAAGACACCCCGGCCAGAAACGAGGAGGTACCGAGCAATGA  
AAATTATGTTGACCGCCACTTGGCGCGCTGTGTGCAGTACCATCAGACAC  
TGTTCAAGAACGTGGAGCTGCTCAACTCCGTTCTGAGCCCCATTGAGTGC  
GCAGAGGTTTTAAGTGCTTCGGCTCTCTTCGCGTTTGCTGGATTCCAGAT  
TGCGGTTGGGCCCCGACCCCGTGCATCTCCCCCGTCAGATCAGTTTCCTCG  
CGTATGTCGTGCTGGAGCTGGGACTGCACTGCTGGTTTGCCGACAGCCTC  
ACTGCTCAGAGCGCCGCTGTGTGCTTGGATGCGTATTCCAGCCAGTGGTT  
CCACGATTGACAAGCGTCCAGCGGTCCCTGTCTTTTGTCATGTTACGAG  
CACAGCGCCCCCTCAAGCTGACTGTGGGCCCTTTCGCCACTCTCTCACTA  
GAACTGTTTCGGCTCGATTATGCAGACTTCCTATTCGTATCTGACACTGCT  
GAGACAATTTAACTCCGAAAATTAG

**Amino Acid Sequence**

MREEDTPARNEEVPSNENYVDRHLARCVQYHQTLFKNVELLNSVLSPIEC  
AEVLSASALFAFAGFQIAVGPDPVHLPRQISFLAYVVLELGLHCWFADSL  
TAQSAAVCLDAYSSQWFHDSTSVQRSLSFVMLRAQRPLKLTVGPFATLSL  
ELFGSIMQTSYSYLTLLRQFNSEN\*

***Odontotermes formosanus* Odorant receptor 11 (*OforOR11*) (OR651439)**

**Nucleotide Sequence**

ATGACCGTCATCCCGATCATGCTGTGTGCCACAGGATACCTCATGATGCA  
CGGTGTCAATGTCACCAGCTACTTCAAGTACCTCGTCCTGTTTCATGCTGG  
TCATGTACAAACTGCTGGTGTACTGCTGGTATGGCCAGGATGTTATCAAT  
CACAGCGAAGCAGTGCAGACAGCGCTCTGGGGCACCGACTGGTACCTGCT  
GTCGCCCCGCTTCAAGCGTCTGGTTTCCATGATGCTCATGAGGGCCGGCA  
GGGCTGTCAAATAAGGAACGGCATTTCACGATCTGTGTTTTGCGACC  
TTCGCAGCGGTGATGAACACTGCATATTCGTACATCGCACTGCTACGACA  
GGTCATCGAACCGTAA

### **Amino Acid Sequence**

MTVIPIMLCATGYLMMHGVNVTSYFKYLVLFMLVMYKLLVYCWYGQDVIN  
HSEAVQTALWGTDWYLLSPAFLKRLVSMMLMRAGRAVKLRNGIFNDLCFAT  
FAAVMNTAYSIALLRQVIEP\*

***Odontotermes formosanus* Odorant receptor 12 (*OforOR12*) (OR651440)**

### **Nucleotide Sequence**

ATGGTGGCAATTGGAGAGGTCTTCCAGTTTGTGGTTAGTCTGGATGACTG  
GCAGCAGAGCCTAAGGCACATCATTCTGCTCTTTCTGTCTCTGTCACAAA  
TACTGATGTACTGCGGCTTCGGTGAGCAAGTGCTGCAGGGGGGGTGGGAT  
GTGGACCACGCTATGTATTCAACACCATGGTACGCGTACTCGCAGAAGTA  
CAAGAAACATCTGGCTCTGGTGATAATGCGCGCGCAGCGACCAGTGGAGA  
TTACCGTTGGTCATTACTACAGCCTGTCACTGCAATCGTGTGAACTGATC  
CTTTCGAACATATACTTCTTCTCCATGTTTCCTGAACCAGATTAACAACAA  
ATCAAAATCTGCTGCTCTCAATTGA

### **Amino Acid Sequence**

MVAIGE VFQFV VSLDDWQQSLRHIILLFSLSQILMYCGFGEQVLQGGWD  
VDHAMYSTP WYAYSQKYKKHLALVIMRAQRPVEITVGHYYSLSLQSC ELI  
LSNIYFFSMFLNQINNKS KSAALN\*

***Odontotermes formosanus* Odorant receptor 13 (*OforOR13*) (partial) (OR651441)**

### **Nucleotide Sequence**

ATGGTCATAATGGAGGATACATTTTTTCTCGTATTGCTCGGACCCTTCTT  
ATCTATAGCCGCCGGATTGTGTTTTACTGCGTACACAATGATGACGATGT  
CTGGGAACTACGGTGAGATAATACAGGTGTTTCTAGTTGTTTTCGCAATG  
ATGGCCAAGTTACTGATTTTCTGCTGGCTTGGAATGAACTGACAGATCA  
GTCTGAACAGGTCCGCCAAGCGGCGTGGGAAAGCAACTGGGTGGGGACAG  
ATACCTCGCATCAACATTCTTTACACATTGTGATAACT

### **Amino Acid Sequence**

MVIMEDTFFLVLLGPFLSIAAGLCFTAYTMMTMSGNYGEIIQVFLVVFAM  
MAKLLIFCWLGNELTDQSEQVRQAAWESNWVGTDTS HQHSLHIVIT

***Odontotermes formosanus* Odorant receptor 14 (*OforOR14*) (partial)** (OR651442)

### **Nucleotide Sequence**

ATGGCGTTCATTCAGCAACTGGAAGATTCGCTGAATATCGTCCTGTGTGG  
TCACTTTATAATTTTACTGGCCACGTTGTGCTTCGCTGCTTTTTCTGCAG  
TTACGAACTGGGGAGATTACGCAAATACGAGTCTAGCAGCTTTAGTTTAT  
ATTGTGTTCTCTAGTGACGTGCTTCTGATATGCTGGTTTGGAAGCTCAGCT  
TACACAACGGGCTGAGAGTGTGAGAGACGCTGCATTCGGG

### **Amino Acid Sequence**

MAFIQQLEDSL NIVLCGHFIILLATLCFAAFSAVTNWGDYANTSLAALVY  
IVFSSDVLLICWFGTQLTQRAESVRDAAFG

***Odontotermes formosanus* Odorant receptor 15 (*OforOR15*)** (OR651443)

### **Nucleotide Sequence**

ATGGATGGAAGTTCGCGGATTGAGAACAAACAGCAGTCGATGAATCACAA  
TTCAGAGCTGATTTTGTCAAAGGAAACTGGTGACGAAAATCGTCTGCTCG  
AAGACGGATTCCAGAGATACCTGGTTAGCTGCATTCAATGTCACAAAGAC  
ATAATTAATTTCTAGATCGCGTAAATGAGGTGACAAGCATAGTGACTTT  
CTTGCAAATACTCAACCTACCAATAATGTTGTGCGTCACAGGATTTTACA  
TGACTCAGAGCGAAAAGGTAGCAACAGCTTTTTACAACACTGACTGGTAC  
AACCAGACGCCAAGGTTCAAACGTCTACTGCCTCTAGCCATCATGCGCGC  
CTCGAAACCTGTCAAAGTTAAAGCCGGCGTGTTCTACGATTTGTCTTTTCG  
TCACTTTCGCTTCGATTATGAACGCAGCTTACACCTATTAACTATGCTG  
ACACAACCTCAATGATTCTGAATTAA



### **Amino Acid Sequence**

MDGSSRIENKQQSMNHNSLILSKETGDENRLLEDGFQRYLVSCIQCHKD  
IINFVDRVNEVTSIVTFLQILNLPIMLCVTGFHMTQSEKVATAFYNTDWY  
NQTPRFKRLPLAIMRASKPVKVKAGVFYDLSFVTFASIMNAAITYLTML  
TQLNDSN\*

### ***OforGRs***

***Odontotermes formosanus* Gustatory receptor 1 (*OforGRI*) (OR651376)**

### **Nucleotide Sequence**

ATGACAGTGATCGTGTTGACTGGAGCCCTGGTGGAACATGCACTTAGTAA  
GGCAAGTGGCATTATGACAGCAGTAGCATGCACAGACAACATAATCAATG  
CTTCCGCTACTACTTCACAAAGACTGGCACATATGACCAAATGTTTGCT  
GTTATGGACTACAGTCTTACAACGGCCATTTTAACATTAATTACCAACTT  
CATTGCCACATTCACATGGAACCTTTCGAGATTTATTCATCATACTGGTGA  
GCCTTGCGCTCAGTGAGAGATTTTCGCTCTTCAATGAGTACCTTGACTCA  
GTCCGGCGGAAGTTGATGCCAGAAAGCTTCTGGAGCCAAATGAGAGAAGA  
ATACAACAGTCTCTCACATCTCACCAGGACTCTTGATTCTTGCATTTCCA  
AGATTGTGCTTGTGTCCTTTGCAAGTAACCTGTACTTCATTTGTCGTCAG  
CTCCTGAGTAGTCTGAGCCCATTAGATGGTTTAGTAGACACTGTATACTT  
CTGCTGGTCATTTGGCTTTCTGTTGTTTCAAGAACAGTGACATTGTCTCTGT  
ATGCATCAAGAATATATGATGAAAGTCTGTTGCCAAAGAGGGTACTGTAT  
GATGTTCTCCAGAAAGCTACAAAATAGAGGTATCAAGATTTCTGGATCA  
GATAGTGACAGACAGAGTGGCACTATCAGGAATGAACTTTTTCTACATCA  
CAAGAACCCTGTTGTTGACATTTACCACAGATTGCAGTACAGATGGTGTA  
CTTTTGCTTGTCTTTTGGATATGTACTTCTACGCATAGTTTCGGTGTCCC  
TTTCTGCAGCAAGTATCAATGA

### **Amino Acid Sequence**

MTVIVLTGALVEHALSKASGIMTAVACTDNIINAFRYYYFTKTGTYDQMFA  
VMDYSLTTAILTLITNFIATFTWNFADLFIILVSLALSERFRLFNEYLDS  
VRRKLMPEFWSQMREEYNSLSHLTRTLDSKISKIVLVSFASNLYFICRQ  
LLSSLSPLDGLVDTVYFCWSFGFLFRTVTLISLYASRIYDESLLPKRVLY  
DVPPEYSYKIEVSRFLDQIVTDRVALSGMNFYITRLLLLTFTTDCSTDGV  
LLLFWICTSTHSFGVPFCISKYQ\*

***Odontotermes formosanus* Gustatory receptor 2 (*OforGR2*) (OR651377)**

### **Nucleotide Sequence**

ATGCTGACATCTTACGGTTATCCAAGGAATTTGGGCGACGATGCAAGCT  
GTGTGCTGCCGCACTGCTGACCGCCTCCACAGCCGAACACCTCATGGCTA  
TGTATTCGCGTCTGCTGTCCGCTCTGCCAGATTCCGGCGGGAGGTTTAGAT  
ATTATCCGTGTCTTCTTCGTGACCTGGTTCGAGCAGGTATTTAAAGTGAC  
AAACTACGCTCTCTGGAAGGCGGTGCTGCTGCAGCTGTCCAACCTTCGTGG  
CTACCTTTACGTGGAGCTACATGGATATGTTTGTGACCCTCGTGAGCATG  
GCGCTCACACAGAAGTACCTGCAGCTGCACGAGCGACTGACGACCGTGAG  
CGGCAAGACCGTTTCGTTGAAGTTCTGGCGCGAGGCTCGTCAGCTGTACG  
TCGACCTGTGCTGCCTCACACGGATGGTTGACCATCACATCTCACACATA  
GTGCTGCTGTGCCTGATCAGCGACCTCTACTTCATCTGCCTTCAGCTGTT  
CAACAGCCTCAAGAAAGTGAAGACTTTATATGGATACGTTTTCTTCTTCT  
ACTCTTTCGGCTACTTGCTGTTCCGAGCATGCTTGATGTGCTTCTGTGCT  
GCATTCTTGAACGAGGCCAGCAAGAAACCCAAGGCAGTCCTGTACACAGT  
GCCGTCCGTCAGCTATAACACGGAGGTTGAGCGATTTATCGATCAAGTGA  
CGACCAATGAGGTGGCACTAACTGGACTTCGCTTCGTGACGTTAAACAGA  
CGCTTAGTTTTGACTGTCATTGGTTCAATCATGACGTATGAACTGCTTCT  
CGTTCAACAAGAAGACGTTTCAGGATTTTGGCAGTGAAGAACCACTAAACG  
CGTCCACCGTTACAATGGGTTGA

### **Amino Acid Sequence**

MLTSYGYPRNFGRRCKLCAAALLTASTAEHLMAMYSRLLSALPDSAGGLD  
IIRVFFVTWFEQVFKVTNYALWKAVLLQLSNFVATFTWSYMDMFVTLVSM  
ALTQKYLQLHERLTTVSGKTVSLKFWREARQLYVDLCCLTRMVDHHISHI  
VLLCLISDLYFICLQLFNSLKKVKTLYGYVFFFYSFGYLLFRACLMCFCA  
AFLNEASKKPKAVLYTVPSVSYNTEVERFIDQVTTNEVALTGLRFVTLNR  
RLVLTVIGSIMTYELLLVQQEDVQDFGSEEPLNASTVTMG\*

***Odontotermes formosanus* Gustatory receptor 3 (*OforGR3*) (OR651378)**

### **Nucleotide Sequence**

ATGACCTTCTACGGCATAGCAGCTGCCACTCTCGTCTTGTTCTGAAGCT  
GGCAAGGGGCTGGCCGCAGCTGCTGGTGCAGTGGAGCACCTGGAACAGG  
CTCAGCGCCGCTACGGCACACCACGGTACTTACGCTTCAAGATTCGGTGC  
GTCACCGCCGCACTTCTCTTGGGAGCAACAGTTGAACACGTGCTCAGCGA  
TTACTACACCGTGTCTCTATAGCGCAGGATGTCAACTCCACCAGCAGTG  
TCCTTCGCCGGTACATGCTGAAGACTCACCACCATTTGTTCCAGTACCTC  
GGATACTCCACGCATGCGCATTCTTGGCTACGATTGCCCATACTGTGGC  
CACATTCACCTGGACCTTCATGGACCTGTTTCATCGCCATTACCAGTATCG  
CTCTGACAGAGCGCTTCCGTCTCTTGAACCGACATCTGCAGGCCGTCAGG  
GGGAAGACGCTGTCCGAGCAGTTCTGGAAACAGACACGAGAGAACTACAC  
CAGCCTGACGCATCTCACCGAGACGCTCAATCTCTGCATATCCCACATCG  
TGCTCATGTCCTTTGCAAGCAATCTGTACTTCATCTGCCTCCAGCTCCTC  
TATAGTTTGAGGGGGCTTGCCGACTGGTACTCGCGGGTCTACTTCTACTG  
GTCGTTTCGGGTTCTCTTGGTACGAACAGTCACCGTTTCTCTCGCCATCG  
CTAGCATCAACGACGAGAGTCGTCTGCCCAAGTCCGTCCTGTTTGCTGTT  
CCTTCGGACGGCTACAACATGGAAGTGTCGCGGTTCTACAGCTGGTCAC  
CACGTCGCAAGTGGCGCTCACCGGCCTGAACTTCTTTTCCGTGACCCGCC  
CAATGCTGCTGACGATGGCGGGTACCATCGCCACTTACGAGGTCGTGTTG  
GTGCAGTTCAGTCACATGGACAATAA

### **Amino Acid Sequence**

MTFYGIAAATLVFLKLARGWPQLLVQWSTLEQAQRRYGTPRYLRFKIRC  
VTAALLLGATVEHVLSDYITVSSIAQDVNSTSSVLRRYMLKTHHHLFQYL  
GYSHACAFLATIAHTVATFTWTFMDLFIAITSIALTERFLLNRHLQAVR  
GKTLSEQFWKQTRENYTSLTHLTETLNLCSHIVLMSFASNLYFICLQLL  
YSLRGLADWYSRVYFYWSFGFLLVRTVTVSLAIASINDESRLPKSVLFAV  
PSDGYNMEVSRFLQLVTTSQVALTGLNFFSVTRPMLLTMAGTIATYEVVL  
VQFSHMDN\*

***Odontotermes formosanus* Gustatory receptor 4 (*OforGR4*) (partial) (OR651379)**

### **Nucleotide Sequence**

ATGTTTTGGGTAGCACCACACTGCGTAACTGGAGAAACAGGCTGTCGCCT  
GCTGCAAACCTTCTTTTGGCGACATTTTATACAGCATCGTCTTCATCGCCG  
TTTCTACTTTTCTTGTTATGTACTATTCCAACATCTGGAATATCACGAAC  
GTGTTTTCCATTTGTAATGTCAGTGAGAAGGTAATAGCCTTCAGCGTCAT  
TCTGCAGTTCGTGTTGTCGGCGTTTGTGTGTCTCCTAAAGCGGCACACAA  
TAATGAATATTGCAAATCAGCTGGCAGGTCTTAACGCCTCACTCAAACGT  
TCCTGTGCCTGTGTTTGGAAGAAGGTCTGCATTATCCTCATGTCTCATCT  
CTCTATCAGCCTCCTGAGTGTAGCCAGTTGCTTTTTATCGGACCTGTTTT  
CTCGCATGCGAGGTCCAAATCGTGTGTCATTTATAACCTTCAACGCAATG  
ACTTCTGCCTGCTTTCTTACTGAGTTTCAAATCGTTTGTTTCTTGATGCT  
TTTGAAGCAACTTATTTCCGACTTGAACGACTCCATTCGTGATCTTGGA  
GAATAAAAGGTAACAAAGGTAACCCCTGTTCTTGTTCCCAAATGTTACCA  
CTGAACAGCACGACACCAGCGTTCGTCTCTTCAGCCTACGAAAAGCTGCA  
ACAGAATACCACGAACAGCGATTCCCACAGAACAAAAGTGATTTTCGTAC  
GAGATATTCAGGATTCTCTTTGTGCAGCCTCTGAGACACTGAACTCTGCA  
TATTCTTTCCTGCTGCTCTACACCTCAGCGAAGATGTTTCATCTGTCTTAC  
CCACAGTCTCTACTTCATTCTCCTACGCCTCTTCATAACCGGCTCCAACA  
CCTGTGACGTGGGGTCACCATATTCATATTACATGTGGTTCCTGCACTAC

TCCATCAAGCTGGTGTGGCTGGTCTTCTACAGCAGCTCGGCTATCCAGCA  
GGGAAACCGCACTGCAGTTCTGGTGCACAACTGATCACCAAGACGCAGG  
ATCCTGGGCTGAGAGAGGAGCTTCGTCTGTTCTCACTTCAGCTC

#### **Amino Acid Sequence**

MFVVAPHCVTGETGCRLLQTSFGDILYSIVFIAVSTFLVMYYSNINWITN  
VFSICNVSEKVIASFVILQFVLSAFVCLLKRHTIMNIANQLAGLNASLKR  
SCACVWKKVCILMSHLSISLLSVASCFLSDLFSRMRGPNRVSFITFNAM  
TSACFLTEFQIVCFMLLLKQLISDLNDSIRDLGRIKGNKGNPCSCSQMLP  
LNSTTPAFVSSAYEKLQNTTNSDSHRTKVIFVRDIQDSLCAASETLNSA  
YSFLLLYTSAKMFICLTHSLYFILLRLFITGSNTCDVGSPYSYMWFLHY  
SIKLVWLVFYSSSAIQQGNRTAVLVHKLITKTQDPGLREELRLFSLQL

*Odontotermes formosanus* Gustatory receptor 5 (*OforGR5*) (OR651380)

#### **Nucleotide Sequence**

ATGAGGCTCATCGTCGTGTTGATCATGGTGACATGCGTACGGGAAATCTT  
GTACCAGGCACTGGAAAGCAACCTGAGCAACTATTTGGTACTGATGACGT  
ACTGGTACCAAACATTGGTACGTGACACGTTGGGTCTCATGTGGTACCTA  
CTGTGCTACCTGCTACGAAGCACTGCTCAGCACCTGGCCACCAGCTTTCA  
GAAGGATGTAGACACTGCTGCGCGCCCCAGCCTGGTAATCGCACGTTACA  
ACGCGCTGTGGCTACAGTTCAGCCGCGTGGTACGTCAGACCGGGGTGGCT  
ATGTGCTACACGTATGGCTACTACGTACTCTACCTGTTCTCATGAGCAC  
CGTGTCCCTGTACGGGCTGTTATCCACCCTGACAAAGGGCTTCCATTTGC  
GCCTCGTCTACCTGGTGGGCGACAGCATTATTACTGGCACCGAGCTCTAC  
ATCATCTGTGACGGTGCCAATTCCGTCACCCGAGAGGTGGGTCTAAGATT  
CCAGGGGAGGCTGTTGGACATCAGACAGACACCATTGGGCAATAAAACGG  
AGAAGGAGGTTGACGCCTTCTTGAGAACCATCGAACTGCGTCCGCCGGAA  
ATCAGTTTCGGAGATTACGTCATCGTGAACAGAGGAATGCTACTGTCATT  
GGGTTCCATGATGGTCACGTACCTCGTGGTCCTGCTGCAGTTGGGGATTG  
CGGGAACATCCGATCAAAACGACGCTGCGAACGCTACTACGTCATAG

### **Amino Acid Sequence**

MRLIVVLIMVTCVREILYQALESNLSNYLVLMTYWYQTLVRDTLGLMWYL  
LCYLLRSTAQHLATSFQKDVDTAARPSLVIARYNALWLQFSRVVRQTGVA  
MCYTYGYVLYLFLMSTVSLYGLLSTLTKGFHLRLVYLVGDSIITGTELY  
IICDGANSVTREVGLRFQGRLLDIRQTPLGNKTEKEVD AFLRTIELRPPE  
ISFGDYVIVNRGMLLSLGSMV TYLVLLQLGIAGTSDQNDAANATTS\*

***Odontotermes formosanus* Gustatory receptor 6 (*OforGR6*) (partial) (OR651381)**

### **Nucleotide Sequence**

ATGGCGGTATCGATTCACCTGGCACTCGATGGTGGTATCGTACCTCTGCAT  
GAAAGCATCTAGGCGACTGGCGAAGCGCACTGCAGTGCTGGTACACAGGC  
TACTGAGCAAGGCCAGGGATCCTGAGACCAAAGTGGAGCTTGAACCTTTC  
TCGCTGCAGCTCCTACATCGGAAGGTCCGATTCACAGCCTGCGGGTTCTT  
TCCTTTGGACTTCACACTGCTATACTCGATTGTCGGCGCTGTTACGACGT  
ATCTGGTCATACTGATTCAGTTTCAACTCACGTTTGCGACTGGAAGCAGA  
TTTGCGACAAATACGTCATTATCACCACCTAACACCACCATGATTTC

### **Amino Acid Sequence**

MAVSIHWHSMVVSYLECMKASRR LAKRTAVLVHRLLSKARDPETKVELELF  
SLQLLHRKVRFTACGFFPLDFTLLYSIVGAVTTYLVILIQFQLTFATGSR  
FATNTSLSPNNTTMIS

***Odontotermes formosanus* Gustatory receptor 7 (*OforGR7*) (OR651382)**

### **Nucleotide Sequence**

ATGGGGCACATTTCAACTGTGCTTCGCAA ACTACTGCTTGCAATTCATAC  
TGATCCAGCAACTCTGTCTGAACTGGAACACTTCTTACAACACGTCGCTC  
TACGTAAGTTCAAATTCACGGTATTCGGATTCCTCACCCTCGATTTGTCT  
CTGCTAGTCTCCACGATGGGCGCCGTGGTCACGTATCTTGTGATCCTCAT  
GCAGTTCCAAATGGCAAGTAACAGTTCAACTGCATGTACCAAAATGTGA

### **Amino Acid Sequence**

MGHISTVLRKLLLAFTDPATLSELEHFLQHVALRKFKFTVFGFLTL DLS  
LLVSTMGA VVTYLVILMQFQMASNSSTACTKM\*

***Odontotermes formosanus* Gustatory receptor 8 (*OforGR8*) (partial) (OR651383)**

### **Nucleotide Sequence**

ATGGCGAAGCAAACGCACGTTGAAGTCCGCAGAGTCCTGAGACCACGTGA  
CGCCGTGCACCAGACGCCTGGCCGCTGGGGACACAAGGACGCTCCTTGGA  
ACACGGAGACGGATGAAGTCAGGGTTCAGACAGCGGACGTCACTACAAAT  
CTTCCGGACGTCAGGGACGCTGAAGATAAGAGCATCAGGGACACCGCAGT  
GGCATATCCTGACGCCCAAAGTTTCCACCGCGCCATCTCCGCTATAGTCG  
TGCTGGGGCAGTGCTTCGGTCTCCTGCCTGTGCATGGCGTAACGGCGTCA  
AGCGCGCAAGGTCTCAGCACTGCAGCCATGGAGGTTTATTGTACTCTAAC  
C

### **Amino Acid Sequence**

MAKQTHVEVRRVLRPRDAVHQTPGRWGHKDAPWNTETDEV RVQTADVTTN  
LPDVRDAEDKSIRDTAVAYPDAQSFHRAISAI VVLGQC FGLLPVHGVTAS  
SAQGLSTAAMEVYCTLT

***Odontotermes formosanus* Gustatory receptor 9 (*OforGR9*) (OR651384)**

### **Nucleotide Sequence**

ATGTCCATGAATCGGCCAGTGATATCCGTCCTTG GTTTCGTGACCATCAA  
TAAAGGAACGGTAAAATCTTATGCGTCCACACTGGTGACCTACATGATAG  
TCCTGTTGCAGTTCAGCATGGGACAGCATAAGCCTGACAATAACTGCAAT  
GTGCTGCAGAACACAACAGAGACAAACTGA

### **Amino Acid Sequence**

MSMNRPVISVLGFVTINKGTVKSYASTLV TYMIVLLQFSMGQHKPDNNCN  
VLQNTTETN\*

*OforSNMPs*

*Odontotermes formosanus* Sensory neuron membrane protein 1 (*OforSNMP1*) (OR651358 )

**Nucleotide Sequence**

ATGTTTCGCCTTGGGTTCAGGAGTTGGATTCTACGGTTTCCCGTCTCTAAT  
CCGCAGCCAGATAGCATCAAATTTAGCTCTGAAGAAGGGATCTGATTTAA  
GGAAACTGTGGTCCAAGATTCCTGATGGGATTGACTTCAAAATATATATG  
TTCAATATAACAAATCCAATGGACGTACAAGCAGGAAAGAAACCAATAGT  
GACCGAAATTGGACCATATTTCTATGAAGAATACAAAGAGAAGCTAGACC  
TCAAAGACCACAATGAAGACGATACAGTTTCATTCAATCCACGAGATTAT  
TTTATATTCAAGAGAGAGAAATCTGGAGGTTTAACTGGAGATGAAATCAT  
CACCATAACCACATATGCCTATACTGGCAATGGCACTGGCAGTGGAGCGCG  
AAAAGCCAGCGGCCCTGAAGCTAATCAACAAGGCAATACCTCACATCTTC  
GGGCATCCGACCTCGGTCTTCTTAACGGCGCCTGTGAAGAACATTCTGTT  
CGATGGGATTCCCCTGTACTGCAACGTCACAGATTTTTCCGCCAAAGCCA  
TTTGCTCAGAAATAAGGAAAAACGACAAAAACTTTCTGAAATTAGGTGAA  
GATATCTTCGGGTTTTTCATTCTTCGGAACGAAAAACAACAGCGCTGGAGG  
AAGGTTCCGCGTGAAACGTGGGATTCAGGATATTAAGGAGGTGGGGCGAG  
TTGTGGAGTACGAAGGGCATAAACAACCTGTCAGTCTACGATGGAGAAGAG  
TGTAACAAGTTCAGAGGAACGGACTCCACCATCTTCGCGCCCTTCCTTAC  
TCCAAGCGACAAGATCGAAGCTTTTGCTCCCGACCTCTGCAGGTCTATAG  
GGGCTGTGTACAAGGAGTCGATCGTGTACAAAGGTATACACAGCTATAGT  
TACGGCGCCGATTTTCGGCGACATGTCTACCGACCCGGAACCTCAAGTGTTT  
CTGTACGACTCCAACCACTTGCATGAAGAAAGGCATTCACGACCTGACGA  
GATGTACAGGGGCACCCCTCATGGCGTCACTTCCTCACTTCTACGACGCC  
GCAATGGAGTATCAGACGGGAGTGATCGGCCTCAACCCTTCGAAAGAGAA  
ACATGAGATACTGATGGTATTCGAACCGTTGACGTCCACACCTCTGGTTG  
GATACAAGAGACTGCAGTTCAACATAGATGTTTCATGCTATTGACAAGATT



GACCTCATGAAGGATATTCCCACAGTACTTCTCCCCGTATTGTGGGTGCA  
AGAGGGAATGGAAGTGAACAAGAGTACCTGGACAAGGTAGCCAGCATCT  
TCAAGATCATAGGCGCAGTGGACGTGGTCAAGTGGATCCTGATGGTGTTA  
GGAGGAGGATGTGGTGCAGCAGGCGCAATCTTAGGGTACCGCAAGAAGTC  
AAACGAAATGGACGTCGATGTGTACCAAGTGTGCCGAAGAAACCAGCAG  
GAATCACACCTCTGGAGGTGCAAACGCTACCCAGATACTGA

#### **Amino Acid Sequence**

MFALGSGVGFYGFPSLIRSQIASNLALKKGSDLRKLWSKIPDGIDFKIYM  
FNITNPM DVQAGKKPIVTEIGPYFYEEYKEKLDLKDHNEDDTVSFNPRDY  
FIFKREKSGGLTGDEIITIPHMPILAMALAVEREKPAALKLINKAIPHIF  
GHPTSVFLTAPVKNILFDGIPLYCNVTDFSAKAICSEIRKNDKNFLKLGE  
DIFGFSFFGTKNNSAGGRFRVKRGIQDIKEVGRVVEYEGHKQLSVYDGEE  
CNKFRGTDSTIFAPFLTPSDKIEAFAPDLCRSIGAVYKESIVYKGIHSYS  
YGADFGDMSTDPELKCFCCTPTTCMKKGHDLTRCTGAPLMASLPHFYDA  
AMEYQTGVIGLNPSKEKHEILMVFEPLTSTPLVGYKRLQFNIDVHAIDKI  
DLMKDIPTVLLPVLWVQEGMELKQEYLDKVASIFKIIGAVDVVKWILMVL  
GGGCGAAGAILGYRKKSNEMDV DVSPSPKKPAGITPLEVQTLPRY\*

***Odontotermes formosanus* Sensory neuron membrane protein 2 (*OforSNMP2*) (OR651359)**

#### **Nucleotide Sequence**

ATGAAGAAAGTGTCACTGAGGAATCAGTCCTCCGTATGGCTGGTCCTGTC  
TGGGATGACCATCTTCGTGCTAGGGGCCGTGCTGGGATGGTATGGGTTC  
CGGCGTTAATAAGAAGCCAAATTACTGCTAACCTTGAGTTGAAGGAAGGA  
GCTGAGAGAAGGGAAATTTGGGAAAGGGTTCCTTATCCGATGGATTTCAA  
GATATACTTATTCAACGTAACAAACCCGATGGATGTTCAGAAGGGAGCAA  
CGCCTGTCGTT CAGGAAGTGGGGCCGTACTGTTACAAGGAAGACAAAGAG  
AAGGTCAATATTGTGGATCATGAAGACGATGATACAGTGTCTTCAACTT  
GAAAGACACGTGGTATTTCAACAAGGATGAGTCGGGCACCCTTACTGGCG  
AAGAGAACATCACCATTCCGAATGTACTACTTCTGGGTATGGTTTTGACG

GCACAGCGCGAGCAGCCCATAGCCCTGAAGCTGATCAACACAGCCATCCC  
ACACATCTTCGACAACCCGAACCTCTGTATTCGTCACAGCCCCAGCAAAA  
ATTTGCTGTTCTGAAGGCGTCGCGTTCAATTGCACATCCAGTGACTTCTCT  
ACGAAGGCGGTCTGCTCAGAATTGAAAAAGAGAGCCCATAATTTCCACAG  
AATCAGCGAAGACATCTACACGTTTTCTATTTTCGGATTCAAAAATGGCA  
CTGTGCGGGAGAGGTTTGAGGTAAAGAGAGGAATGGAAGACATAAAGGAT  
TTAGGCAAAATGGTGGAATTCAAGGATCAGAAAGTACTGACTGTCTGGGA  
CGGAGAAGAGTGCAATGCGCTCAGAGGAACAGATTCCACCATCTTTCCTC  
CCTTCCTCACAAAGAAAGACAAGATTGAAGGTTTCATTCCAGACATGTGC  
AGGGCATTAGTGGCGGAGTACCAGTACGCCACAACGTACAGAGGAATCCG  
GTCTTACAAATACAGCGCAGACTTGGGGGACACATCGACTGACCCGGAAC  
TCGGGTGTTACTGCAGGACGCCAACTACGTGTCTCAAGAAAGGGGTTCAC  
GATGTCTCGCGGTGTGCAGGGTACCCCGTCGTGATGTCACTGCCACACTT  
CTACCTGGCTGACGACGAGTACCTGGATGGCGTAGTTGGCCTGAACCCTA  
CACAGGAGAAGCACGAGGTCACCTTTGCTCTTCGAACCGCTGACAGCTACA  
CCACTTGAAGCTTACAACAGACTGCAGCTGAACATCCCCCTGCACCGCAC  
CGACAGCATCGACCTACTGAAGAACATCAAATCAACGCTTCTTCCTATCT  
TGTGGATGCAGGAGAACATGGAGCTCCATCAAGAGTACGTTGACAAGATT  
TTGGACCTCTTCCTTATAATCAGCATAATGGGCGCCATGAAATGGATAAT  
GGTAGCTGTTGGAGGAGTTCTCACTGCCACTGGATTCTTCTTCATTATGC  
GGAGAAAGAACGATCATACTGTCATCACAGAATTACCACCCATCGCCTTA  
AAACCCACAGGGAAATCGGCCAAGACGGAGCATGTTATCGAAAAATAG

#### **Amino Acid Sequence**

MKKVSLRNQSSVWLVLSGMTIFVLGAVLGWYGFPALIRSQITANLELKEG  
AERREIWERVYPMDFKIYLFNVTNPMDVQKGATPVVQEVGPYCYKEDKE  
KVNIVDHEDDDTVSFNLKDTWYFNKDESGTLTGEENITIPNVLLLGMVLT  
AQREQPIALKLINTAIPHIFDNPNSVFVTAPAKNLLFEGVAFNCTSSDFS  
TKAVCSELKKRAHNFHRISEDIYTFSIFGFKNGTVRERFEVKRGMEDIKD

LGKMVEFKDQKVLTVWDGEECNALRGTDSTIFPPFLTKKDKIEGFIPDMC  
RALVAEYQYATTYRGIRSYKYSADLGDTSTDPELGCYCRTPTTCLKKGVH  
DVSRCAGYPVVMISLPHFYLADEYLDGVVGLNPTQEKHEVTLLFEPLTAT  
PLEAYNRLQLNIPLHRTDSIDLLKNIKSTLLPILWMQENMELHQEYVDKI  
LDLFLIISIMGAMKWIMVAVGGVLTATGFFFIMRRKNDHTVITELPPIAL  
KPTGKSAKTEHVIEK\*

***Odontotermes formosanus* Sensory neuron membrane protein 3 (*OforSNMP3*) (partial)**  
(OR651360)

#### **Nucleotide Sequence**

ATGCCTGTGGCGGTGTTCTTCAATGTCTACCTATTCAACGTAACCAATCC  
TGATGAAGTGCAGAAAGGAGCCAATCCAGTCGTGAAGGAAATCGGACCTT  
ATGTATATGATGAGTACCGAGAGAAATTCGACATCGAAGACAAAGGTGAT  
GGCACTCTTTCCTACTTACAAAACCTCTACATTTTATTTCAACAAGGAAAA  
GTCGGGGAACCTCTCAGAAGATGACGTAGTTACTGTACTGAACTTTGCGC  
TCGTGGGTACGGTCTTAAAGGCACAGAGATACCTTCCTTCCTCCATGACA  
CTAGATGGTGTTTTTAAGGAGATATTCCACGGGTCAGAGAACGTATTTCA  
CACTGCCACAGTGGGGGATCTGGTTTGGCGTGGGGTAAAAGTCGTGACTT  
GCACGGAGACAAATAAGACGTCGCCTGAAGCTTCGATGATCTGCAGTGTA  
CTGAAAAGCCTACTGCCGGCTATGATGACTGAACATGAACCAGGGATCTT  
CAAGATGGCGTATTTTCGTTACAAGAACAACACAAATGATGGTCGATACC  
GCATTAACAGCGGAATTTTCG

#### **Amino Acid Sequence**

MPVAVFFNVYLFNVTNPDEVQKGANPVVKEIGPYVYDEYREKFDIEDKGD  
GTLSYLQNSTFYFNKEKSGNLSEDDVVTVLNFAVGTVLKAQRYLPSSMT  
LDGVFKEIFHGSENVFHTATVGDLVWRGVKVVCTETNKTSPEASMICSV  
LKSLLPAMMTEHEPGIFKMAYFRYKNNTNDGRYRINSGIS

***Odontotermes formosanus* Sensory neuron membrane protein 4 (*OforSNMP4*) (partial)**  
(OR651361)

**Nucleotide Sequence**

ATGTGTTTAGGTGTGTCTGCAATCTATTCCTTGCCACATTTCTACAACGC  
TTCTCCTGACTACCAACAGTACATCCAGGGTTTGAATCCAAACAGGAAGG  
AACATGAGACATTCCTGTATATTGAACCGGAAACCGGTACCGTTCTCCGG  
GGGTTCAAGCGGATGCAGATGAATATATTCCTTTCTAAAACGGATGTACT  
AAGCTCCCTAAATAATGTGTCCGAAGGTCTCTTTCCTGTCTTCTGGGTTG  
AAGAGGGCATTGAACTGGATGACAAGGATCTCACTCCAATTCACCGTCTG  
TATACACTCATGTATGCCTTCGCCATTATCAGGTGGTTACTTGTAGCAGC  
TGGC

**Amino Acid Sequence**

MCLGVSAIYSLPHFYNASPDYQQYIQGLNPNRKEHETFLYIEPETGTVLR  
GFKRMQMNIFLSKTDVLSSLNNVSEGLFPVFWVEEGIELDDKDLTPIHRL  
YTLMYAFAIIRWLLVAAG
